1 **TITLE PAGE**

2 **Title**

3 Invasive species-driven trophic cascades: Are cane toads indirectly contributing to small  
4 mammal collapses across tropical Australia?

5

6 **Short running title**

7 Ecosystem impacts of cane toads

8

9 **Authors**

10 Ian James Radford<sup>1\*</sup>, Leigh-Ann Woolley<sup>2</sup>, Chris R. Dickman<sup>3</sup>, Ben Corey<sup>1</sup>, Dane  
11 Trembath<sup>4,5</sup>, Richard Fairman<sup>1</sup>

12

13 **Affiliations**

14 <sup>1</sup>Department of Biodiversity, Conservation and Attractions, PO Box 942, Kununurra WA  
15 6743.

16 <sup>2</sup>NESP Threatened Species Recovery Hub, Research Institute for the Environment and  
17 Livelihoods, Charles Darwin University, Casuarina, NT 0909, Australia.

18 <sup>3</sup>NESP Threatened Species Recovery Hub, School of Life and Environmental Sciences,  
19 University of Sydney, NSW 2006, Australia.

20 <sup>4</sup>Museum and Art Gallery of the Northern Territory, GPO Box 4646, Darwin, NT 0801,  
21 Australia.

22 <sup>5</sup>Australian Museum Research Institute, Australian Museum, 1 William St, Sydney, NSW

23 2010, Australia.

24

25 **\*Corresponding author:** [ian.radford@dbca.wa.gov.au](mailto:ian.radford@dbca.wa.gov.au)

26

27

28

29 **Abstract**

30 Apex predators are fundamentally important in regulating many ecosystems, and  
31 perturbations of their populations are frequently implicated in ecosystem declines or  
32 collapses. In considering small mammal declines in northern Australia, most attention has  
33 focused on interactions between a mammalian apex predator—the dingo *Canis dingo*—and a  
34 meso-predator, the feral cat—*Felis catus*. Little consideration has been given to the possible  
35 implications of changed reptilian predator assemblages resulting from invasion by a toxic  
36 anuran invader, the cane toad (*Rhinella marina*), on small mammals. We used reptile removal  
37 records from licenced reptile catchers in three widely spaced towns in the savannas of  
38 northern Australia to explore potential impacts of toads on apex and meso-predatory snakes  
39 and large lizards. In addition, simultaneous fauna survey data from one town with reptile  
40 removal records, coinciding with toad invasion, were used to identify cascading impacts  
41 through the savanna ecosystem. Intervention analyses revealed empirical linkages between  
42 toad invasion, apex predator declines, meso-predator increases and declines of small  
43 mammals and other prey groups. Based on the timing and strength of intervention we  
44 postulate a novel conceptual model linking recent mammal declines with trophic cascades  
45 following toad invasion, where the loss of large, anurophagous (toad-eating) reptilian apex  
46 predators allowed increases in mammal-eating meso-predatory snakes. The conceptual model  
47 is discussed in relation to prevailing hypotheses regarding northern Australia's dramatic  
48 small mammal declines. Future studies will need to quantify these putative interactions and  
49 test their comparative importance so that appropriate management can be implemented to  
50 stem the ongoing losses of mammal fauna.

51

52 **Keywords**

- 53 Meso-predator release, apex predators, invasion ecology, ecosystem cascade, tropical  
54 savanna

56 **INTRODUCTION**

57 *"We were the Leopards, the Lions; those who'll take our place will be little jackals, hyena -*  
58 *and sheep", Giuseppe Tomasi di Lampedusa (The Leopard)*

59 The importance of apex predators and their interactions with smaller meso-predators in  
60 maintaining global ecosystems has received increasing attention in recent decades. Meso-  
61 predator suppression by apex predators is widespread both geographically and taxonomically  
62 [1]. Apex predators clearly play a crucial role in maintaining many ecosystems [1], but debate  
63 continues about how pervasive their effects are [2-3]. In Australia, for example, several  
64 studies suggest that a mammalian apex predator, the dingo *Canis dingo*, suppresses feral cat  
65 *Felis catus* activity and the impacts of the latter on native species [4-8], but other work  
66 contests this [3]. The influence of apex predators may change depending on the number of  
67 different sized meso-predators within predator hierarchies, leading to different outcomes for  
68 prey populations [9]. One important lesson from classic predatory studies (e.g. wolves, moose  
69 and bears in North America) [10] is that all relevant predators must be considered to achieve  
70 a full mechanistic understanding of prey dynamics.

71

72 Meso-predatory interactions have been reported most commonly among mammalian  
73 predators, raptors, and in marine systems [1]. In recent years, however, meso-predator release  
74 within reptilian predator assemblages has been identified in northern Australian savanna  
75 ecosystems resulting from invasion by a toxic anuran, the cane toad *Rhinella marina* [11-15].  
76 Here, losses of large reptilian apex predators – varanid species – due to post-ingestion  
77 poisoning by toads, have resulted in measurable increases among smaller, meso-predatory  
78 reptiles which presumably had been eaten by varanids [11-13]. Despite the rarity of  
79 comparable examples [but see 16-17], it is not surprising that this case of reptilian meso-

80 predator release was identified in Australia given the relative abundance of large reptiles in  
81 Australian ecosystems, as well as the paucity of large mammalian predators [18]. However, it  
82 remains unclear whether meso-predator release among reptiles might have wider implications  
83 within the tropical savanna [14, 19].

84

85 Recent rapid and dramatic collapses of small to medium-sized mammals in northern Australia  
86 [20-21] continue to puzzle ecologists, although local declines here have been foreshadowed  
87 for several decades [22-26]. Recent thinking concerning these declines implicates feral cats  
88 interacting with changed fire regimes, large herbivores, and possibly ecosystem condition/  
89 productivity, to negatively affect small mammals [4, 25, 20, 27-30, 21, 31]. Cats (along with  
90 foxes *Vulpes vulpes* in sub-tropical regions) are thought to have been the primary drivers of  
91 historical extinction events across Australia, particularly in arid regions where arrival of cats  
92 often coincided with sudden mammal declines even before European settler arrival or the  
93 operation of other threatening processes [32, 4]. However, there is little direct evidence to  
94 link recent accelerated collapses of northern Australian mammal assemblages in the first  
95 decade of the twenty-first century to cat predation. Cats coexisted with susceptible mammals  
96 here for a century [33] prior to the recent collapses [34, 20] and there is no evidence that  
97 recent changes in cat populations, fire or grazing regimes coincide with these sudden  
98 declines. Experimental studies have shown that cat predation can cause local extinctions of  
99 rodents inside fenced savanna areas [27, 35], and convergence of cats at recently burnt areas  
100 [28, 30] can dramatically increase predation-related mortality of small mammals [31]. There  
101 is also a link between more severe fire regimes and lower mammal abundance/richness [34,  
102 36-37]. However, these studies do not establish that cat and fire interactions have caused  
103 mammal collapses at regional scales [38]. There is no evidence currently available showing

104 that cat populations or predation pressure have increased at the same time that mammal  
105 declines were occurring. There are also no data to link any sudden exacerbation of  
106 fire/grazing related disturbance regimes at regional levels with recent observed mammal  
107 declines. Thus, there is no empirical evidence to directly link recent mammal collapses in the  
108 Northern Territory [34, 20-21] with changes in the operation of any known threatening  
109 processes (e.g. cats, fire regimes, large herbivores) at the same time that the observed  
110 mammal declines occurred.

111

112 One factor acknowledged as potentially influencing mammal assemblages, but for which  
113 little evidence has been adduced, is invasion by the cane toad [20-21]. Clear evidence links  
114 recent declines of one mammal species, the northern quoll, *Dasyurus hallucatus*, to the  
115 arrival of the cane toad [39-40]. Quolls actively hunt and ingest toads and are subject to high  
116 rates of mortality due to lethal poisoning [40-41]. However, declines among other small  
117 mammals have not been linked to toad arrival. This is because most mammals do not eat cane  
118 toads, or escape poisoning by avoiding the toxic glands [40]. Similarly, small mammals are  
119 not known to be eaten by cane toads [39].

120

121 In this paper we present a new hypothesis explaining recent north Australian small mammal  
122 declines based on observed changes seen in savanna fauna following invasion by cane toads  
123 at three separate locations across north-western Australia. The hypothesis is that recent  
124 mammal collapses, since 2005 in the Northern Territory, and since 2010 in Western  
125 Australia, may be attributable to the arrival of cane toads via a series of cascading impacts on  
126 reptilian predator assemblages including mammal-eating species. Changes following cane  
127 toad invasion included an immediate decline of large-gaped, large-bodied, generalist

128 (partially anurophagous and reptile-eating) elapid snakes such as the king brown snake  
129 (*Pseudechis australis*) and varanid lizards (from here referred to as apex predators) as seen  
130 during previous studies [15, 39, 42]. We interpret these collapses as due to poisoning upon  
131 ingestion of toxic cane toads [39, 15]. Another change at study sites was an immediate  
132 increase among smaller-gaped, smaller-bodied (i.e. meso-predatory), dietary specialist  
133 snakes, lizards and anurans, including mammal-eating pythonid and cobubrid snakes.  
134 Increases among meso-predatory reptiles was also previously reported in several studies [11-  
135 13, 19]. We interpret increases as due to a meso-predator release following loss of large  
136 generalist apex reptilian predators [15]. Additional changes associated with cane toad  
137 invasion at one of our study sites where we had continuous fauna monitoring data were  
138 declines among fauna which is prey to meso-predatory reptiles. Prey included small  
139 mammals, very small skinks (< 8 cm long) and many invertebrates. Declines among  
140 invertebrates following toad invasion has been reported before [43], though this was  
141 interpreted as due to an increase in predator biomass due to cane toad presence, not due to  
142 general increases among a range of meso-predators. We interpret declines among prey groups  
143 as being driven by increases among their meso-predators, including mammal- and lizard-  
144 eating snakes, medium-sized lizards and frogs, as these species all increased following cane  
145 toad invasion. We synthesise these empirical observations in the form of a conceptual model  
146 that articulates the trophic links between small mammals, cane toads and reptilian predators  
147 (Fig. 1). This provides us with a complementary hypothesis to the cat – fire/disturbance  
148 driven hypothesis that has dominated the literature on north Australian mammal declines over  
149 the last decade [4, 27, 36, 21, 30].

150

## 151 **METHODS**



152 *Study areas*

153 The main study location was the town of Kununurra (2016 census population 5,300) and its  
154 surrounding savanna landscapes including Mirima National Park in far north-eastern Western  
155 Australia (Fig. 2a, b). The region has a tropical monsoonal climate, with high temperatures  
156 year-round (daily mean maximum 29.6-36.0 °C), and rainfall (913 mm annually) occurring  
157 predominantly from November to April. Several tropical savanna habitats occur around  
158 Kununurra. Aside from urban and agricultural (broad-acre cropping) habitats, these include  
159 black soil plains, eucalypt woodlands dominated by tussock grasses, pindan (*Acacia tumida*)  
160 savanna woodlands dominated by *Triodia* hummock grasses and annual *Sorghum* on  
161 sandplain, and shrub/*Triodia* spp. dominated woodland on rocky sandstone. Kununurra is  
162 adjacent to perennial riparian habitats and permanent water due to the damming of the Ord  
163 River (Fig. 2a, b). Minor study locations at Katherine (popn. 6,300) and Darwin (popn.  
164 136,800) in the Northern Territory have similar tropical monsoonal climates to Kununurra  
165 (Fig. 2a), with daily mean maximum temperatures of 30.1–37.7 °C (Katherine) and 30.6–33.3  
166 °C (Darwin), and mean annual rainfalls of 1023 mm and 1729 mm respectively. Both towns,  
167 like Kununurra, are small and are predominantly surrounded and interspersed by tropical  
168 savanna habitats.

169

170 *Reptile removal records*

171 Removal records of reptiles were obtained from Kununurra, Katherine and Darwin. Trained  
172 personnel (government officers or volunteers) in these towns remove snakes and other  
173 reptiles when requested by members of the public. Reptile removal records for Kununurra  
174 were consistently kept from 2006 prior to cane toad invasion in 2010, through to 2017,  
175 encompassing both pre- and post-invasion periods (Fig. 2b). Wildlife officers are compelled

176 to attend snake callouts for reasons of public safety, so data can be considered representative  
177 of snake occurrences in the town. Records included date and time of removal, the officer's  
178 name who attended, the location/address, the species and size (length) of the animal removed.  
179 Data are presented as monthly counts for analysis. In Katherine, snake removal records were  
180 available from 1998 to 2008 and covered the pre-invasion (1998-2000) to post-cane toad  
181 invasion (2001-2008) periods. Darwin snake removal data were available more sporadically  
182 during nine non-consecutive years encompassing pre- and post-invasion by toads. Annual  
183 species counts were made for 1997, 1998 and 1999 prior to toad invasion. Records including  
184 attending officer, date, time, address, actions and species were kept for the post-toad period in  
185 2005, and then annually from 2011 to 2015. Despite the potential for species and habitat bias  
186 in the wildlife removed from urban/rural environments in towns [44], we assume that the  
187 reptile data represent surrounding savannas because of the small size and isolation of these  
188 towns within the vast expanse of uninhabited savannas across the whole of northern Australia  
189 (Fig. 2a). This assumption is supported by records of species identities, as most snakes and  
190 other reptiles removed were common species characteristic of northern Australian savanna  
191 assemblages [45].

192

### 193 *Fauna surveys*

194 To obtain additional information on predators, and to sample populations of potential prey,  
195 we conducted fauna surveys at 15 sites in Mirima NP, Kununurra, from 2006 to 2017 (see  
196 Fig. 2a). This period encompassed both pre- and post-cane toad invasion. Mammal trapping  
197 data from Elliott and pitfall trap surveys were available for 23 months, though not all sites  
198 could be surveyed every month due to logistical constraints (Table S1). Surveys at sites m, n  
199 and o in Jul 2006, Jan and Sep 2007, May 2008, Mar and Apr 2017 (Table S1) used 50 × 50

200 m quadrats and 20 Elliott traps (alternating large  $15 \times 15.5 \times 46$  cm and medium  $9 \times 10 \times 33$   
201 cm traps) around the perimeter and 10 pitfall traps (20 cm diameter, 60 cm deep) placed  
202 along two parallel drift fence-lines [34, 26]. Mammal surveys at sites a, b, c, d, e, f, g, h, i, j,  
203 k and l from Mar 2010 to Apr 2017 (Table S1) used a  $40 \times 100$  m grid with 18 Elliott traps  
204 (alternate 9 large and 9 medium traps) placed 20 m apart in the grid and 4 pitfall traps (29 cm  
205 diameter 40 cm deep) placed at each corner with 4 shallow trenches (5 to 15 cm deep)  
206 directing animals into traps [46]. Mammal surveys occurred for either 4 or 7 nights. All  
207 mammals were identified to species, weighed, head and body length measured, and marked  
208 prior to release (permanent marker on ear). Recaptures were not counted. Mammal data are  
209 presented as total mammals per 1000 trap nights to standardise them; low numbers for  
210 individual mammal species represented in the surveys (Table S2) precluded species analyses.

211

212 Funnel trapping was used to survey reptile, frog and invertebrate assemblages during 25  
213 months between Jul 2008 and Apr 2017 (Table S1). A  $40 \times 100$  m survey grid was used with  
214 18 funnel traps ( $18 \text{ cm} \times 60 \text{ cm}$ ) placed 20 m apart within the grid (Radford & Fairman,  
215 2015). Funnel traps were placed in the middle of a 6 m long shallow trench (5 to 15 cm deep)  
216 to attract and direct animals into traps. All reptiles and frogs were identified to species and  
217 snout vent and tail length measured; animals were marked (permanent marker pen) prior to  
218 release to establish recaptures. Insects ( $> 5$  mm long) were identified to Order or Family, and  
219 other invertebrates to Class or Order. Vertebrate species and invertebrate taxa were  
220 categorized according to trophic roles for analysis depending on their diets [47-52, 45].  
221 Counts of reptile, frog and invertebrate species/taxa per trap session were recorded and used  
222 in analyses. For mammal, reptile, frog and invertebrate taxa we consider all Mirima survey  
223 sites, irrespective of survey methodology, to be sampling replicates for the sake of the

224 analyses due to similarities in productivity and geology (sand or sandstone), vegetation  
225 (hummock savanna woodland/shrubland) and fauna assemblages.

226

### 227 *Arrival of cane toads*

228 The arrival month of cane toads in Kununurra was set as the date when animals were first  
229 placed in bins at drop-off points by members of the public. The first records of toads in  
230 Kununurra were in April 2010. A second arrival date was set at the Mirima NP fauna survey  
231 sites adjacent to Kununurra when the first toads appeared in survey traps in April 2011 [46].  
232 Cane toads first arrived in Katherine in 2001 and in Darwin in 2005 (T. Parkin, G. Gillespie,  
233 unpublished data).

234

### 235 *Statistical modelling*

236 Species with fewer than 20 records were not included in modelling analyses. We used `tscount`  
237 [53] in R version 3.5.1 [54] to fit generalised linear models to our time series count data for  
238 each species or species group at different sites, i.e. integer-valued GARCH log-linear models  
239 with logarithmic link. In this way, the conditional mean could be linked to potential  
240 covariates (e.g. rainfall, temperature, etc., Table S2) and past values or past observations (i.e.  
241 previous means). We captured short range serial dependence using a first order  
242 autoregressive term on the previous observation (`beta_1`) and yearly seasonality using a 12<sup>th</sup>  
243 order autoregressive term (`alpha_12`). Either a Poisson, or in the case of over-dispersion, a  
244 negative binomial conditional distribution, was chosen. Model fit and assessment were based  
245 on probability integral transform histograms, the autocorrelation function (ACF) of response  
246 residuals, and a cumulative periodogram of Pearson residuals. Using backward stepwise

247 elimination, covariates were excluded on improvement in the model Akaike Information  
248 Criterion and only significant covariates (of those listed in Table S2) were included in final  
249 models (Table 1). Autoregressive terms were adjusted if the ACF plot indicated subsequent  
250 autocorrelation beyond beta\_1 and alpha\_12.

251

252 To identify shifts in faunal count data post-cane toad invasion, we used intervention analyses  
253 (R package *tscount*) [53], where intervention, as defined by Fokianos & Fried [55], was  
254 included as a covariate in each model. This covariate included an integer vector giving the  
255 time when the intervention effect occurred ( $\tau$ ); in our case,  $\tau$  differed for each sample site  
256 depending on when toads arrived or the detection of a lag in intervention effect. The  
257 intervention covariate also included a numeric vector with constants specifying the type of  
258 intervention ( $\delta$ ), for  $0 < \delta < 1$  the effect decays exponentially and for  $\delta = 1$  there is a  
259 persistent effect of the intervention after its occurrence). We chose  $\delta = 1$  as there was a  
260 persistent intervention effect after toad invasion and we were testing for a permanent shift  
261 post-intervention. Significance of the intervention effect was assessed for each species using  
262 the corresponding confidence intervals of intervention covariate coefficient estimates, and for  
263 trophic groups using an intervention test (valid only for long time series or large sample  
264 sizes) to test for intervention of type  $\delta = 1$  at the time of cane toad invasion.

265

## 266 **RESULTS**

### 267 *Reptile removal and fauna survey data*

268 Apex predatory species, including five species of elapid snakes ( $n = 364$ ) and six species of  
269 varanids ( $n = 42$ ); meso-predatory species/taxa, including 23 snake ( $n = 6584$ ), nine lizard ( $n$

270 = 561) and seven frog species (n = 487); and prey species/taxa, including five mammals (n =  
271 104), six lizards (n = 599) and six invertebrate taxa (n = 1221) were recorded during  
272 removals and surveys (Table S2). During Kununurra removals, 328 snakes and reptiles were  
273 recorded during 130 consecutive months from Mar 2006 to Dec 2017 (Table S1). In  
274 Katherine, 1430 snakes were recorded during 11 years of callouts (1998 to 2008), and in  
275 Darwin 5168 snakes and lizards were recorded during nine non-consecutive years (1997-  
276 1999, 2005, 2011-2015) (Table S1, S2). In Mirima NP, 2932 reptiles, frogs and invertebrates  
277 were recorded during 25 non-consecutive monthly survey periods from 2008 to 2017 (Tables  
278 S1, S2). Small mammals were recorded during 23 survey months in Mirima NP between  
279 2006 and 2017 (Table S1, S2).

280

### 281 *Responses to toad invasion among predator and prey groups*

282 As predicted under the conceptual model (Fig. 1), apex predators declined significantly after  
283 cane toad invasion, almost all meso-predators increased, and most prey groups – including  
284 small mammals – also declined based on intervention tests (Table 1, Figs 3, 4). For combined  
285 apex predators in Kununurra, the largest GLM coefficient estimates were for intervention,  
286 indicating a strong impact of toad invasion relative to other explanatory variables (Table 1).  
287 The strongest additional explanatory variable for apex predators was a 6 month temporal  
288 auto-correlative effect indicating a seasonal influence on predator numbers (Table 1, Fig. 3a,  
289 Fig. 4a). Intervention (toad invasion) was also significant (marginally) among apex predators  
290 in both Darwin and Katherine, with rainfall and monthly autocorrelative terms supported as  
291 additional explanatory variables in the model (Table 1).

292

293 Four of the five identified meso-predator groups, including the mammal-eating pythons (Fig.  
294 3b), skink-eating elapids, colubrid snakes and combined frogs, agamids and large skinks (Fig.  
295 4b), showed significant increasing intervention responses (Table 1). Intervention responses  
296 had higher coefficient estimates than for all other explanatory variables for meso-predators,  
297 indicating that toad invasion was the strongest predictor of change among these groups  
298 (Table 1). All three meso-predatory groups from Katherine and Darwin (mammal-eating  
299 pythons, skink-eating elapids and colubrid snakes) also had significant intervention responses  
300 (Table 1). The smallest of the identified meso-predators, *Eremiascincus/Heteronotia* (Table  
301 S2) had no significant intervention response (Table 1). Additional strongly supported  
302 explanatory variables for meso-predatory snakes (pythons, small elapids and colubrids)  
303 included seasonal auto-correlation (alpha\_6) and rainfall, and for the frog/agamid/large skink  
304 group included rainfall in the previous month, maximum temperature, vegetation cover and  
305 time since fire (Table 1).

306

307 Among prey groups, small mammals showed a significant negative response to intervention  
308 (invasion) (Table 1, Fig. 3c). Other prey groups (e.g. herbivorous invertebrates (< 3 cm),  
309 small skinks, Table S2) also declined significantly post-invasion (Table 1, Fig. 4c).  
310 Exceptional among savanna prey groups were larger carnivorous invertebrates (3-12 cm,  
311 Table S2) which did not show a significant intervention response (Table 1). In addition to  
312 intervention, the strongest explanatory variables for small mammals were rainfall in the  
313 previous 2 months, and months since fire (Table 1). Herbivorous invertebrates and small  
314 skinks responded most strongly to rainfall in the previous month, seasonal auto-correlation  
315 and vegetation cover (Table 1). Large carnivorous invertebrates responded most strongly to

316 seasonal auto-correlation, maximum temperature and rainfall in the previous month (Table  
317 1).

318

319 Species-specific apex, meso-predator and prey responses generally conformed to responses  
320 predicted in the conceptual model (Fig. 1) with a few minor exceptions (Table S4). Among  
321 meso-predatory species, the skink *Eremiascincus isolepis* and gecko *Heterontia binoei*, in  
322 Kununurra, showed no intervention responses. These were among the smallest of the meso-  
323 predators (13 cm and 9 cm, Table S2) The lesser black whip snake, *Demansia vestigiata*, in  
324 Katherine, uniquely among small skink-eating elapids, showed a significant negative  
325 intervention response (Table S4). Among small skinks, *Carlia* spp. showed a positive  
326 intervention response which was the opposite to small skink responses overall (Table S4).  
327 *Carlia* spp. were the largest among the small skinks (ca. 11 cm) with others in the group < 10  
328 cm long (Table S2).

329

## 330 **DISCUSSION**

331 Small mammal declines in northern Australia have not previously been temporally or  
332 spatially linked with the arrival of cane toads [34, 20-21], nor to cascading impacts among  
333 reptilian predators [14, 19]. To some extent this may have arisen due to small numbers of the  
334 larger reptilian predators usually trapped during standard fauna surveys leading to difficulties  
335 in detecting trends coinciding with changes among smaller more numerous species including  
336 mammals. In this study we present simultaneous data on large reptilian predator assemblages  
337 using novel wildlife removal data alongside standard fauna monitoring data collected at the  
338 same time and place. These combined data reveal multiple and pervasive ecosystem-wide  
339 trends coincident with cane toad invasion which have not previously been apparent from



340 standard surveys alone. The trends identified in this study are consistent with the hypothesis  
341 that cane toad invasion initiates ecosystem-wide trophic cascades (Fig. 1), as suggested by  
342 Doody et al. [14] and Feit et al. [19]. These trophic cascades include the functional loss of  
343 keystone apex reptilian predators including large-gaped elapid snakes [42] and large varanid  
344 lizards (*Varanus* spp); a meso-predatory release of smaller-gaped predominantly mammal-  
345 and skink-eating snakes (pythons, colubrids and small elapids) [15] and invertebrate-eating  
346 predators (e.g. frogs and agamid and large scincid lizards); and finally a decline among  
347 savanna prey groups including small mammals, smaller skinks and invertebrates, resulting  
348 from increased predation pressure by meso-predators (Fig. 1). Although previous studies  
349 have speculated that there may be a link between toad-driven changes to predator  
350 assemblages and small mammal declines [21], this is the first study to empirically link  
351 temporal and spatial data on toad invasion, reptilian predator assemblage change and small  
352 mammal declines.

353

354 Although the conceptual model presented here (Fig. 1) seems plausible, is partially supported  
355 by literature [39, 15, 14] and we have temporal and spatial links between mammal declines  
356 and toad invasion from Kununurra (Table 1), it is unclear if observed historical patterns of  
357 mammal decline align with sequential timing of toad invasions across northern Australia?  
358 Unfortunately monitoring programs for large reptilian predators and savanna fauna generally  
359 were not widespread, co-ordinated or sometimes even initiated prior to 2001-2005 [56] when  
360 cane toads first appeared in the Katherine/Darwin region (Fig. 2a). Therefore, there is little  
361 quantitative evidence to link mammal declines, their timing and/or their associated  
362 threatening processes [56]. However, it is clear that some northern mammal declines pre-date  
363 cane toad arrival. Mammal declines reported at mainland Northern Territory sites up to 2005

364 [23-24, 56-58], pre-2010 in the Kimberley region of Western Australia [22, 25-26], or up to  
365 the present on Melville Island [59] cannot be attributed to cane toad invasion because the  
366 invader had not yet arrived at these locations (Fig. 2a). However, many of these pre-toad  
367 declines affected only some mammal species or groups [22, 26, 56-57, 60-61], were subtle  
368 and relatively difficult to detect [23-24] or were based on few temporal data points [59],  
369 making it difficult to interpret changes as decline rather than as natural population variability.

370

371 In contrast to the above changes, more recent mammal declines post cane toad invasion in  
372 Kakadu and elsewhere in the Northern Territory since 2005 [34, 20, 56, 36, 21, 58] have been  
373 pervasive across the entire suite of critical weight range mammal species (mean adult body  
374 weight 35 - 5500 g) [62], have involved dramatic population collapses to levels almost  
375 beyond detectability, and have been relatively well documented. In addition, mammal  
376 abundance ahead of the cane toad invasion in the Kimberley has remained relatively high and  
377 stable throughout the same period (e.g. mean trap success 7.24%, as per Radford et al. 2014),  
378 until the declines noted in this study in the eastern edge of the Kimberley after cane toads  
379 arrived in 2010. In contrast, mammal abundance behind the cane toad front in the Northern  
380 Territory has remained consistently very low ever since invasion in 2005 (mean trap success  
381 < 1% trap success) [34, 58]. These data collectively support the notion that factors other than  
382 cane toads (e.g. cats and disturbance regimes) [4, 21] have been involved in driving small  
383 mammal declines across north western Australia pre cane toad invasion, but also that cane  
384 toad arrival has led to a recent increase in the pervasiveness of mammal assemblage-wide  
385 collapses on top of the previous declines.

386

387 Current thinking pertaining to small mammal declines in northern Australia centres on feral  
388 cat predation as a key driver [4, 20-21, 27-28, 31]. However, the cat and cane toad  
389 hypotheses are not incompatible and may act as complementary (and cumulative) drivers of  
390 mammal declines. The role of cats in northern Australia is seen as an extension of historical  
391 nationwide cat- and fox-driven mammal declines and extinctions, especially in the arid zone  
392 [4, 32]. However, the cat hypothesis relies on interactions with other factors to be a tenable  
393 explanation for northern mammal declines [20-21, 36]. This is because cats apparently  
394 coexisted with savanna mammals for over a century before recent north Australian declines  
395 [33]. Cat predation is known to interact with high intensity fire regimes to concentrate cat  
396 hunting activity [28, 30], and this increases mortality in local mammal populations [29, 31].  
397 However, cat predation pressure is also thought to be influenced by apex predators, in  
398 particular the dingo (*Canis dingo*) [4-6]. High density of dingoes in high rainfall, high  
399 productivity areas of the Kimberley has been argued to reduce predation impacts by meso-  
400 predatory cats [5, 26]. However, cats are also known anecdotally to be depredated by large  
401 reptilian predators (and also to eat reptiles) [63]. As meso-predators, cats too may benefit  
402 from cane toad driven declines of apex reptilian predators, similar to those recorded here  
403 among meso-predatory snakes, lizards and frogs (Table 1). Future research is required to  
404 examine interactions between cane toad invasion, reptilian predator cascades and their  
405 interactions with cat impacts on small mammals if a greater understanding of mammal  
406 declines in northern Australia is to be achieved.

407

408 The conceptual model presented in this study has empirical support, highlighting the timing  
409 and apparent strength of observed trends associated with cane toad invasion. However,  
410 raising conceptual models/hypotheses to explain observed patterns is only one step in the

411 process of establishing a model's efficacy. The next step is for the conceptual model to be  
412 subject to tests, or falsified, to enable us to evaluate further if the hypothesis provides a  
413 tenable explanation for mammal declines relative to other hypotheses. Future research is  
414 needed on meso-predatory snake densities and predation rates to test whether predation by  
415 these reptilian predators is sufficient compared to that of cats to cumulatively drive mammal  
416 declines. Recently, estimates of cat densities and predation rates were made across the  
417 continent [63-66], including the Kimberley region [29]. Equivalent estimates are not  
418 available for reptilian predators and their impacts on mammals. What fragmentary data we  
419 have on snake densities and home ranges [67-70] suggest much greater densities of snakes  
420 than for cats and also much smaller home ranges. This means that even if snake ingestion  
421 rates are much lower than for cats, they may cause comparable overall predation pressure.  
422 We know that snakes in some cases can have very large impacts on mammalian and avian  
423 assemblages. These include one meso-predatory snake from this study (e.g. *B. irregularis*)  
424 [16]. In addition, there is information from a cat exclosure experiment in northern Australia  
425 [35] that showed similar predation by pythons on savanna rodents to that by cats. However,  
426 the hypothesis that reptilian predation could be equivalent to that of feral cats, and the  
427 possibility that cumulative impacts could be substantial, needs to be tested more widely  
428 across Australian savanna landscapes if we are to establish its plausibility in playing part in  
429 regional mammal declines.

430

431 Another test to validate the role of cane toad cascades in driving mammal declines, is whether  
432 ongoing toad invasion across the Kimberley leads to rolling changes among reptilian (and  
433 mammalian) predator assemblages and to continuing mammal losses. Following initial cane  
434 toad arrivals in Kununurra/East Kimberley in 2009/2010, cane toads have now spread to

435 Purnululu National Park in the south east Kimberley (ca. 2012), to Drysdale River National  
436 Park in the north Kimberley (ca. 2016), and to the far north Kimberley at Mitchell River  
437 National Park (ca. 2019) (Fig. 2a). If cane toad initiated cascades are a key factor driving  
438 mammal declines, we should expect mammal monitoring programs at these locations to  
439 reveal further declines within five years to one decade following toad arrival. Already the  
440 limited data from Purnululu National Park (Fig. 2a) indicates a ca. 90% decline in mammal  
441 trap success following toad invasion, with pre-toad trap success recorded at 1.4 % in 1989  
442 [71], 1.5 % in 2004/2005 [72] and 3.7% in 2008 [26] prior to toads; at 2.5 % one year  
443 following cane toad arrival in 2013 (Fig. 2a); and then down to 0.42 % and 0.25 % in 2016  
444 and 2017 four and five years post-invasion (I.J. Radford and B. Corey, unpublished data).  
445 Documentation of sequential reptilian predator changes associated with mammal declines and  
446 toad invasion in the wake of cane toad invasion fronts moving across the Kimberley would  
447 provide further empirical evidence for the role of cane toads in driving recent mammal  
448 declines. Ideally, these empirical studies of temporal and spatial changes coincident with cane  
449 toad invasion would be accompanied by experimental exclosure studies, similar to those  
450 conducted for cat impacts on mammals [27, 73, 58, 35], to test the plausibility and magnitude  
451 of reptilian predator impacts on mammals in both pre- and post-invasion savanna ecosystems.

452

453 This study joins others in highlighting the potential importance of reptilian predators, and  
454 reptilian meso-predator release, in the functioning of Australian and global ecosystems [1, 14,  
455 16-17, 74]. One of the meso-predatory species implicated here in driving mammal declines,  
456 *Boiga irregularis*, is already documented as having driven catastrophic declines and  
457 extinctions of an entire avian forest assemblage, as well as small mammals, on the island of  
458 Guam [16]. It is perhaps not surprising that, in a continent with very high reptilian diversity

459 [74-75] and several reptilian niche equivalents of mammalian predators elsewhere [18], as  
460 well as extensive pre-historical extinctions of most large mammal species [4], that reptile  
461 predators play such an ostensibly prominent role in Australian ecosystems.

462

## 463 REFERENCES

- 464 1. Ritchie EG, Johnson CN. Predator interactions, mesopredator release and biodiversity  
465 conservation. *Ecology Letters*. 2009;12:982-998.
- 466 2. Garrott RA, Gude JA, Bergman EJ, Gower C, White PJ, Hamlin KL. Generalizing wolf  
467 effects across the Greater Yellowstone Area: a cautionary note. *Wildlife Society*  
468 *Bulletin*. 2005;33:1245-1255.
- 469 3. Allen BL, Engeman RM, Allen LR. Wild dogma: an examination of recent “evidence”  
470 for dingo regulation of invasive mesopredator release in Australia. *Current Zoology*.  
471 2011;57:568-583.
- 472 4. Johnson C. Australia's mammal extinctions: a 50,000-year history. Cambridge University  
473 Press. 2006.
- 474 5. Kennedy M, Phillips BL, Legge S, Murphy SA, Faulkner RA. Do dingoes suppress the  
475 activity of feral cats in northern Australia? *Austral Ecology*. 2012;37:134-139.
- 476 6. Letnic M, Ritchie EG, Dickman CR. Top predators as biodiversity regulators: the dingo  
477 *Canis lupus dingo* as a case study. *Biological Reviews*, 2012;87:390-413.
- 478 7. Newsome TM, Ballard G-A, Crowther MS, Dellinger JA, Fleming PJS, Glen AS, et al.  
479 Resolving the value of the dingo in ecological restoration. *Restoration Ecology*.  
480 2015;23:201-208.
- 481 8. Leo V, Reading RP, Gordon C, Letnic M. Apex predator suppression is linked to  
482 restructuring of ecosystems via multiple ecological pathways. *Oikos*. 2018;

- 483 9. Levi T, Wilmers CC. Wolves–coyotes–foxes: a cascade among carnivores. *Ecology*.  
484 2012;93:921-929.
- 485 10. Krebs CJ. *The Ecological World View*. University of California Press. 2008
- 486 11. Doody JS, Green B, Sims R, Rhind D, West P, Steer D. Indirect impacts of invasive cane  
487 toads (*Bufo marinus*) on nest predation in pig-nosed turtles (*Carettochelys insculpta*).  
488 *Wildlife Research*. 2006;33:349-354.
- 489 12. Doody JS, Green B, Rhind D, Castellano CM, Sims R, Robinson T. Population-level  
490 declines in Australian predators caused by an invasive species. *Animal Conservation*.  
491 2009;2:46-53.
- 492 13. Doody JS, Castellano CM, Rhind D, Green B. Indirect facilitation of a native  
493 mesopredator by an invasive species: are cane toads re-shaping tropical riparian  
494 communities? *Biological Invasions*. 2013;15:559-568.
- 495 14. Doody SJ, Rhind D, Green B, Castellano C, McHenry C, Clulow S. Chronic effects of an  
496 invasive species on an animal community. *Ecology*. 2017;10:1002/ecy.1889.
- 497 15. Feit B, Letnic M. Species level traits determine positive and negative population impacts  
498 of invasive cane toads on native squamates. *Biodiversity and Conservation*.  
499 2015;24:1017-1029.
- 500 16. Savidge JA. *The Role of Disease and Predation in The Decline of Guam's Avifauna*  
501 *(Extinction, Boiga Irregularis)* Doctoral dissertation, University of Illinois at Urbana-  
502 Champaign. 1986.
- 503 17. Dorcas ME, Willson JD, Reed RN, Snow RW, Rochford MR, Miller MA, et al. Severe  
504 mammal declines coincide with proliferation of invasive Burmese pythons in Everglades  
505 National Park. *Proceedings of the National Academy of Sciences*. 2012;109:2418-2422.
- 506 18. Sweet SS, Pianka ER. Monitors, mammals and Wallace's Line. *Mertensiella*.  
507 2007;16:79-99.

- 508 19. Feit B, Gordon CE, Webb JK, Jessop TS, Laffan SW, Dempster T, Letnic M. Invasive  
509 cane toads might initiate cascades of direct and indirect effects in a terrestrial ecosystem.  
510 *Biological Invasions*. 2018;10.1007/s10550-018-1665-8.
- 511 20. Woinarski JCZ, Legge S, Fitzsimons JA, Traill BJ, Burbidge AA, Fisher A, et al. The  
512 disappearing mammal fauna of northern Australia: context, cause, and response.  
513 *Conservation Letters*. 2011;4:192-201.
- 514 21. Ziembicki MR, Woinarski JCZ, Webb JK, Vanderduys E, Tuft K, Smith J, et al.  
515 Stemming the tide: progress towards resolving the causes of decline and implementing  
516 management responses for the disappearing mammal fauna of northern Australia.  
517 *THERYA*. 2015;6:169-225.
- 518 22. McKenzie NL. Mammals of the Phanerozoic south-west Kimberley, Western Australia:  
519 biogeography and recent changes. *Journal of Biogeography*. 1981;8:263-280.
- 520 23. Braithwaite RW, Muller WJ. Rainfall, groundwater and refuges: predicting extinctions of  
521 Australian tropical mammal species. *Austral Ecology*. 1997;22:57-67.
- 522 24. Woinarski JCZ, Milne DJ, Wanganeen G. Changes in mammal populations in relatively  
523 intact landscapes of Kakadu National Park, Northern Territory, Australia. *Austral*  
524 *Ecology*. 2001;26:360-370.
- 525 25. McKenzie NL, Burbidge AA, Baynes A, Brereton RN, Dickman CR, Gordon G, et al.  
526 Analysis of factors implicated in the recent decline of Australia's mammal fauna. *Journal*  
527 *of Biogeography*, 2007; 34:597-611.
- 528 26. Radford IJ, Dickman CR, Start AN, Palmer C, Carnes K, Everitt C, et al. Mammals of  
529 Australia's tropical savannas: a conceptual model of assemblage structure and regulatory  
530 factors in the Kimberley region. *PLOS ONE*. 2014;9:0092341.



- 531 27. Frank A, Johnson CN, Potts JM, Fisher A, Lawes MJ, Woinarski JCZ, et al.  
532 Experimental evidence that feral cats cause local extirpation of small mammals in  
533 Australia's tropical savannas. *Journal of Applied Ecology*, 2014;51:1486-1493.
- 534 28. McGregor HW, Legge S, Jones ME, Johnson CN. Landscape management of fire and  
535 grazing regimes alters the fine-scale habitat utilisation by feral cats. *PLOS ONE*.  
536 2014;9:e109097.
- 537 29. McGregor HW, Legge S, Potts J, Jones ME, Johnson CN. Density and home range of  
538 feral cats in north-western Australia. *Wildlife Research*. 2015;42:223-231.
- 539 30. McGregor HW, Legge S, Jones ME, Johnson CN. Extraterritorial hunting expeditions to  
540 intense fire scars by feral cats. *Scientific Reports*. 2016;6:22559.
- 541 31. Leahy L, Legge SM, Tuft K, McGregor HW, Barmuta LA, Jones ME, Johnson, C. N.  
542 Amplified predation after fire suppresses rodent populations in Australia's tropical  
543 savannas. *Wildlife Research*. 2016;42:705-716.
- 544 32. Dickman CR. Overview of the impacts of feral cats on Australian native fauna.  
545 Canberra: Australian Nature Conservation Agency. 1996;1-92.
- 546 33. Abbott I. Origin and spread of the cat, *Felis catus*, on mainland Australia, with a  
547 discussion of the magnitude of its early impact on native fauna. *Wildlife Research*.  
548 2002;29:51-74.
- 549 34. Woinarski JCZ, Armstrong M, Brennan K, Fisher A, Griffiths AD, Hill B, et al.  
550 Monitoring indicates rapid and severe decline of native small mammals in Kakadu  
551 National Park, northern Australia. *Wildlife Research*. 2010;37:116-126.
- 552 35. Tuft K, Legge S, Frank ASK, James AI, May, T, Page E, Radford IJ, et al. Further  
553 experimental evidence that feral cats cause local extirpation of small mammals in  
554 Australia's tropical savannas. *Journal of Applied Ecology*

- 555 36. Lawes MJ, Murphy BP, Fisher A, Woinarski JC, Edwards AC, Russell-Smith J. Small  
556 mammals decline with increasing fire extent in northern Australia: evidence from long-  
557 term monitoring in Kakadu National Park. *International Journal of Wildland Fire*.  
558 2015;24:712-722.
- 559 37. Radford IJ, Gibson LA, Corey B, Carnes K, Fairman R. Influence of fire mosaics, habitat  
560 characteristics and cattle disturbance on mammals in fire-prone savanna landscapes of  
561 the northern Kimberley. *PLOS ONE*, 2015;10(6):p.e0130721.
- 562 38. Andersen AN, Cook GD, Corbett LK, Douglas MM, Eager RW, Russell-Smith J, et al.  
563 Fire frequency and biodiversity conservation in Australian tropical savannas:  
564 implications from the Kapalga fire experiment. *Austral Ecology*. 2005;30:155-167.
- 565 39. Shine R. The ecological impact of invasive cane toads (*Bufo marinus*) in Australia. *The*  
566 *Quarterly Review of Biology*. 2010;85:253-291.
- 567 40. Pearson DJ, Webb JK, Greenlees MJ, Phillips BL, Bedford GS, Brown GP, Thomas J,  
568 Shine R. Behavioural responses of reptile predators to invasive cane toads in tropical  
569 Australia. *Austral Ecology*, 2014;39:448-454.
- 570 41. Jolly CJ, Kelly E, Gillespie GR, Philips B, Webb JK. Out of the frying pan:  
571 Reintroduction of toad-smart northern quolls to southern Kakadu National Park. *Austral*  
572 *Ecology*. 2018;10.1111/aec.12551.
- 573 42. Brown GP, Phillips BL, Shine R. The ecological impact of invasive cane toads on  
574 tropical snakes: field data do not support laboratory-based predictions. *Ecology*.  
575 2011;92:422-431.
- 576 43. Greenlees MJ, Brown GP, Webb JK, Phillips BL, Shine R. Effects of an invasive anuran  
577 [the cane toad (*Bufo marinus*)] on the invertebrate fauna of a tropical Australian  
578 floodplain. *Animal Conservation*. 2006;9:431-438.

- 579 44. Shine R, Koenig J. Snakes in the garden: an analysis of reptiles “rescued” by  
580 community-based wildlife carers. *Biological Conservation*. 200;102:271-283.
- 581 45. Cogger H. *Reptiles and Amphibians of Australia*. CSIRO Publishing. 2014.
- 582 46. Radford IJ, Fairman R. Fauna and vegetation responses to fire and invasion by toxic cane  
583 toads (*Rhinella marina*) in an obligate seeder dominated tropical savanna in the  
584 Kimberley, Northern Australia. *Wildlife Research* 2015;42:302–314.
- 585 47. Shine R. Ecology of eastern Australian whipsnakes of the genus *Demansia*. *Journal of*  
586 *Herpetology*. 1980;14:381-389.
- 587 48. Shine R, Slip D.J. Biological aspects of the adaptive radiation of Australasian pythons  
588 (Serpentes: Boidae). *Herpetologica*. 1990;46:283-290.
- 589 49. Shine R. Strangers in a strange land: ecology of the Australian colubrid snakes. *Copeia*.  
590 1991;120-131.
- 591 50. Shine R. Allometric patterns in the ecology of Australian snakes. *Copeia*. 1994;851-867.
- 592 51. Shine R, Madsen T. Prey abundance and reproduction: rats and pythons on a tropical  
593 Australian floodplain. *Ecology*. 1997;78:1078-1086.
- 594 52. Zborowski P, Storey R. *A Field Guide to Insects in Australia*. Second Edition. Reed New  
595 Holland. 2003.
- 596 53. Liboschik T, Fried R, Fokianos K, Probst P. tscount: Analysis of Count Time Series. R  
597 package version 1.3.0. <https://CRAN.R-project.org/package=tscount>. 2016.
- 598 54. R Core Team. R: A language and environment for statistical computing. R Foundation  
599 for Statistical Computing, Vienna. <https://www.R-project.org/>. 2018.
- 600 55. Fokianos K, Fried R. Interventions in INGARCH processes. *Journal of Time Series*  
601 *Analysis*. 2010;31:210–225.

- 602 56. Ziembicki MR, Woinarski JC, Mackey B. Evaluating the status of species using  
603 Indigenous knowledge: Novel evidence for major native mammal declines in northern  
604 Australia. *Biological Conservation*. 2013;157:78-92.
- 605 57. Ibbett M, Woinarski JCZ, Oakwood M. Declines in the mammal assemblage of a rugged  
606 sandstone environment in Kakadu National Park, Northern Territory, Australia.  
607 *Australian Mammalogy*. 2017;doi:10.1071/AM17011.
- 608 58. Stokeld D, Fisher A, Gentles T, Hill B, Triggs B, Woinarski JCZ, Gillespie GR. What do  
609 predator diets tell us about mammal declines in Kakadu National Park? *Wildlife*  
610 *Research*. 2018;10.1071/WR17101.
- 611 59. Davies HF, McCarthy MA, Firth RSC, Woinarski JCZ, Gillespie GR, Andersen AN, et  
612 al. Declining populations in one of the last refuges for threatened mammal species in  
613 northern Australia. *Austral Ecology*. 2018;doi:10.1111/aec.12596.
- 614 60. Palmer C, Taylor R, Burbidge AA. Recovery Plan for the Golden Bandicoot, *Isodon*  
615 *auratus*, and Golden-backed Tree-rat, *Mesembriomys macrurus*, 2004-2009. Department  
616 of Infrastructure, Planning & Environment; 2003.
- 617 61. Woinarski JC, Burbidge AA, Harrison PL. The action plan for Australian mammals  
618 2012.
- 619 62. Burbidge AA, McKenzie NL. Patterns in the modern decline of Western Australia's  
620 vertebrate fauna: causes and conservation implications. *Biological conservation*.  
621 1989;50(1-4):143-98.
- 622 63. Woinarski JCZ, Murphy BP, Palmer R, Legge SM, Dickman CR, Doherty TS, et al. How  
623 many reptiles and killed by cats in Australia? *Wildlife Research*. 2018;45:247-266.
- 624 64. Legge S, Murphy BP, McGregor H, Woinarski JCZ, Augusteyn J, Ballard G, et al.  
625 Enumerating a continental-scale threat: How many feral cats are in Australia? *Biological*  
626 *Conservation*. 2017;206:293-303.

- 627 65. Woinarski JCZ, Murphy BP, Legge SM, Garnett ST, Lawes MJ, Comer S, et al. How  
628 many birds are killed by cats in Australia? *Biological Conservation*. 2017;214:76-87.
- 629 66. Woinarski JCZ, Legge SM, Dickman CR. *Cats in Australia: companion and killer*.  
630 CSIRO Publishing, Melbourne. 2019.
- 631 67. Slip DJ, Shine R. Habitat use, movements and activity patterns of free-ranging Diamond  
632 Pythons, *Morelia-spilota-spilota* (Serpentes, Boidae)-a radiotelemetric study. *Wildlife*  
633 *Research*. 1988;15(5):515-31.
- 634 68. Madsen T, Shine R. Seasonal migration of predators and Prey - A study of pythons and  
635 rats in tropical Australia. *Ecology*. 1996;77(1):149-56.
- 636 69. Brown GP, Shine R, Madsen T. Spatial ecology of slatey-grey snakes (*Stegonotus*  
637 *cucullatus*, Colubridae) on a tropical Australian floodplain. *Journal of Tropical Ecology*.  
638 2005;21(6):605-12.
- 639 70. Corey B, Doody JS. Anthropogenic influences on the spatial ecology of a semi-arid  
640 python. *Journal of Zoology*. 2010;281:293-302.
- 641 71. Woinarski JCZ. The wildlife and vegetation of Purnululu (Bungle Bungle) National Park  
642 and adjacent area. *Wildlife Research Bulletin*. 1992(6).
- 643 72. Partridge TB. Fire and Fauna in Purnululu (Bungle Bungle) National Park, Kimberley,  
644 Western Australia. PhD Thesis. 2009.
- 645 73. Stokeld D, Gentles T, Young S, Hill B, Fisher A, Woinarski J, Gillespie G. Experimental  
646 evaluation of the role of feral cat predation in the decline of small mammals in Kakadu  
647 National Park. Final Report. Department of Environment and Natural Resources,  
648 Darwin. 2016.
- 649 74. Pianka ER. Diversity and adaptive radiations of Australian desert lizards. In *Ecological*  
650 *Biogeography of Australia*. Dr W. Junk Publishers, The Hague. 1981.

- 651 75. Morton SR, James CD. The diversity and abundance of lizards in arid Australia: a new  
652 hypothesis. *The American Naturalist*. 1988;132:237-256.
- 653 76. Gelman A. Scaling regression inputs by dividing by two standard deviations. *Statistics in*  
654 *Medicine*. 2008;27:2865-2873.

655

### 656 **Data Accessibility Statement**

657 Data from Western Australia and owned by the Department of Biodiversity, Conservation  
658 and Attractions can be made available upon request to the first author. Data owned by  
659 separate custodians including the Northern Territory's Flora and Fauna Division, Department  
660 of Land Resource Management, or Rick Shine from the University of Sydney, would have to  
661 be requested separately direct to custodians.

662

663

664

665

666

667

668

669

670

671

672

673

674

675

676

677

678

679

680

681 **Figure legends and embedded figures**

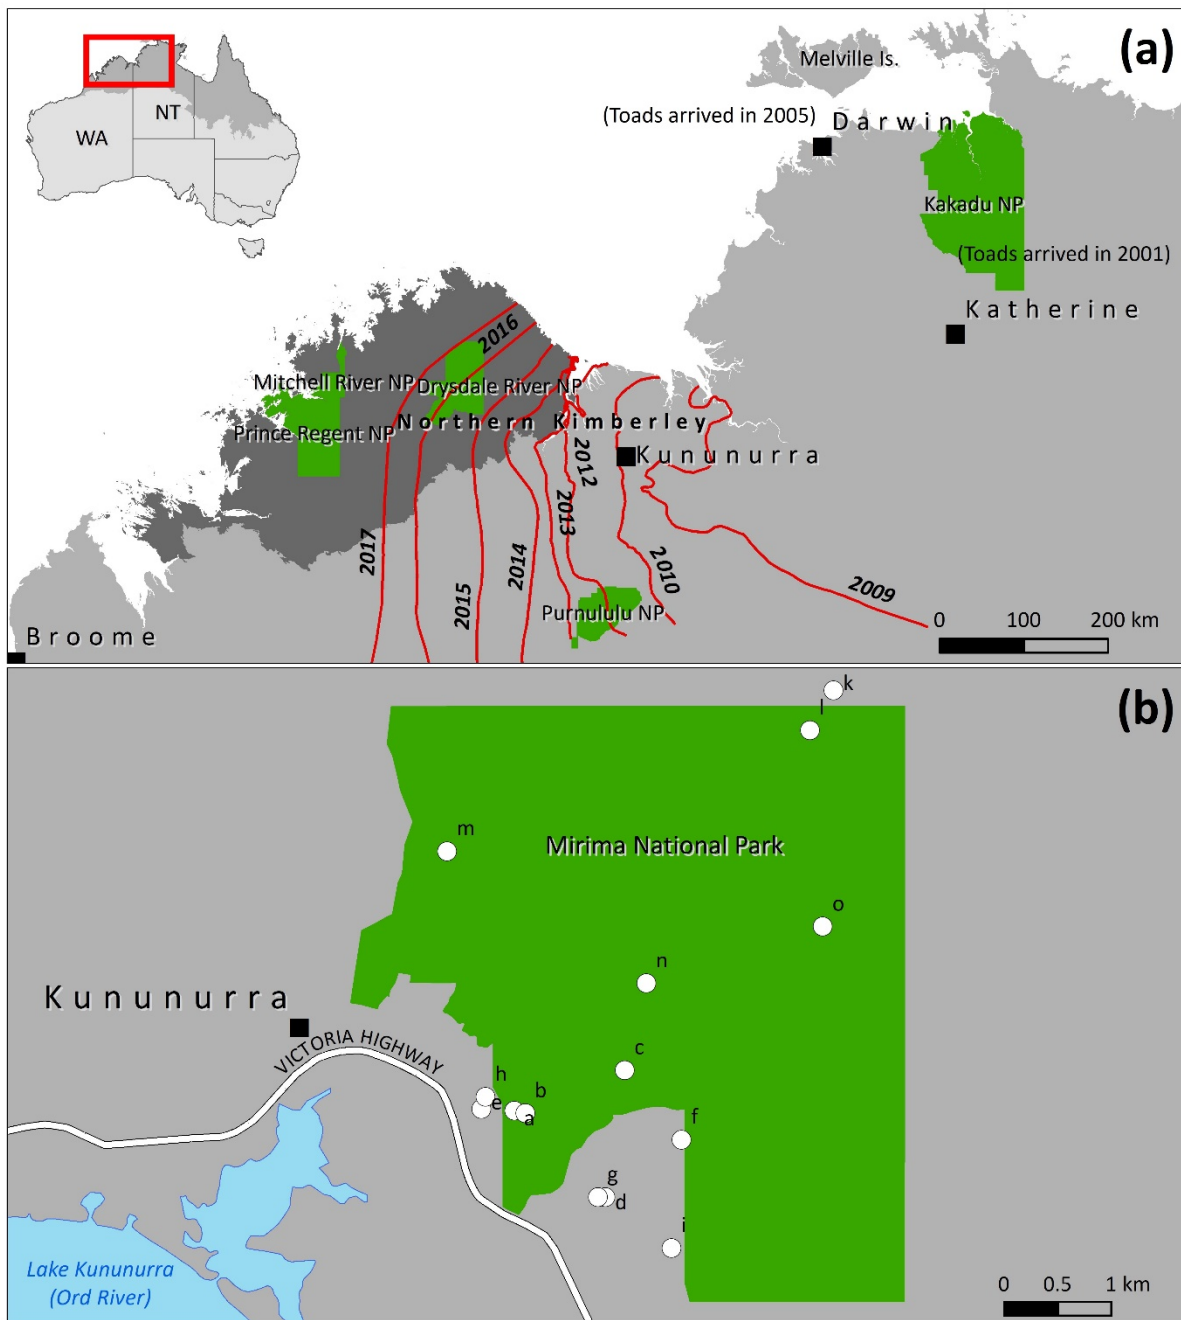

682

683 **Fig. 2** a) North Western Australia including the minor study areas of Katherine and Darwin  
684 and b) the main study area of Kununurra and Mirima National Park survey sites (white dots)  
685 in the Kimberley region of Western Australia (WA). The red inset (a) shows the study region  
686 within the broader savanna biome (darker grey) in Australia. The map also shows sequential  
687 invasion of cane toads (*Rhinella marina*) across northern Australia. Cane toads began

688 arriving in Katherine and Kakadu National Park in the Northern Territory (NT) in 2001 and  
689 were in Darwin by 2005. Red contour lines mark the estimated cane toad invasion front  
690 annually from the end of 2009, when toads first entered WA from the NT, in 2012 when  
691 toads arrived in Purnululu National Park, through to 2016 and 2017 when toads first arrived  
692 in the Drysdale River National Park in the North Kimberley bioregion (dark grey). The Cane  
693 Toad Strategy for WA 2009-2019 provided annual spatial data on invasion fronts. National  
694 Parks are shown in green.



695

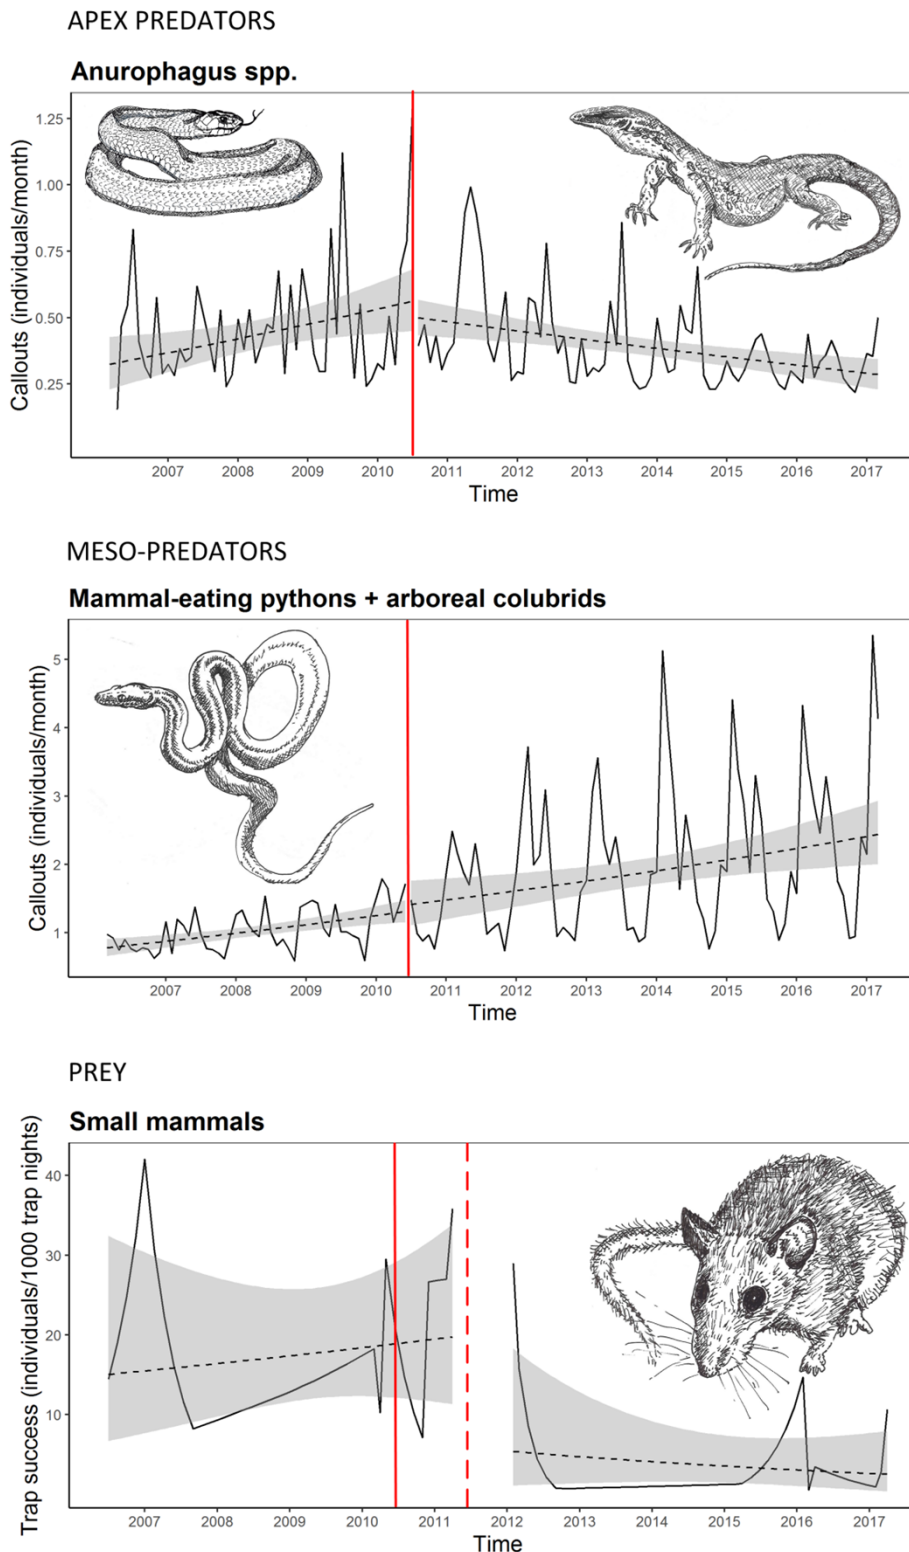

696

697 **Fig. 3.** Modelled trends in occurrence before and after cane toad (*Rhinella marina*) invasion for a) apex  
698 predators (large anurophagous reptiles and elapids) from Kununurra snake callout records, b) meso-predators  
699 (mammal-eating pythons and arboreal colubrids) from Kununurra snake callout records, and c) the small  
700 mammal prey group from Mirima fauna surveys. The vertical solid red line indicates the arrival date of toads in  
701 Kununurra in 2010 and the dashed red line indicates when toads arrived at fauna survey sites in 2011.

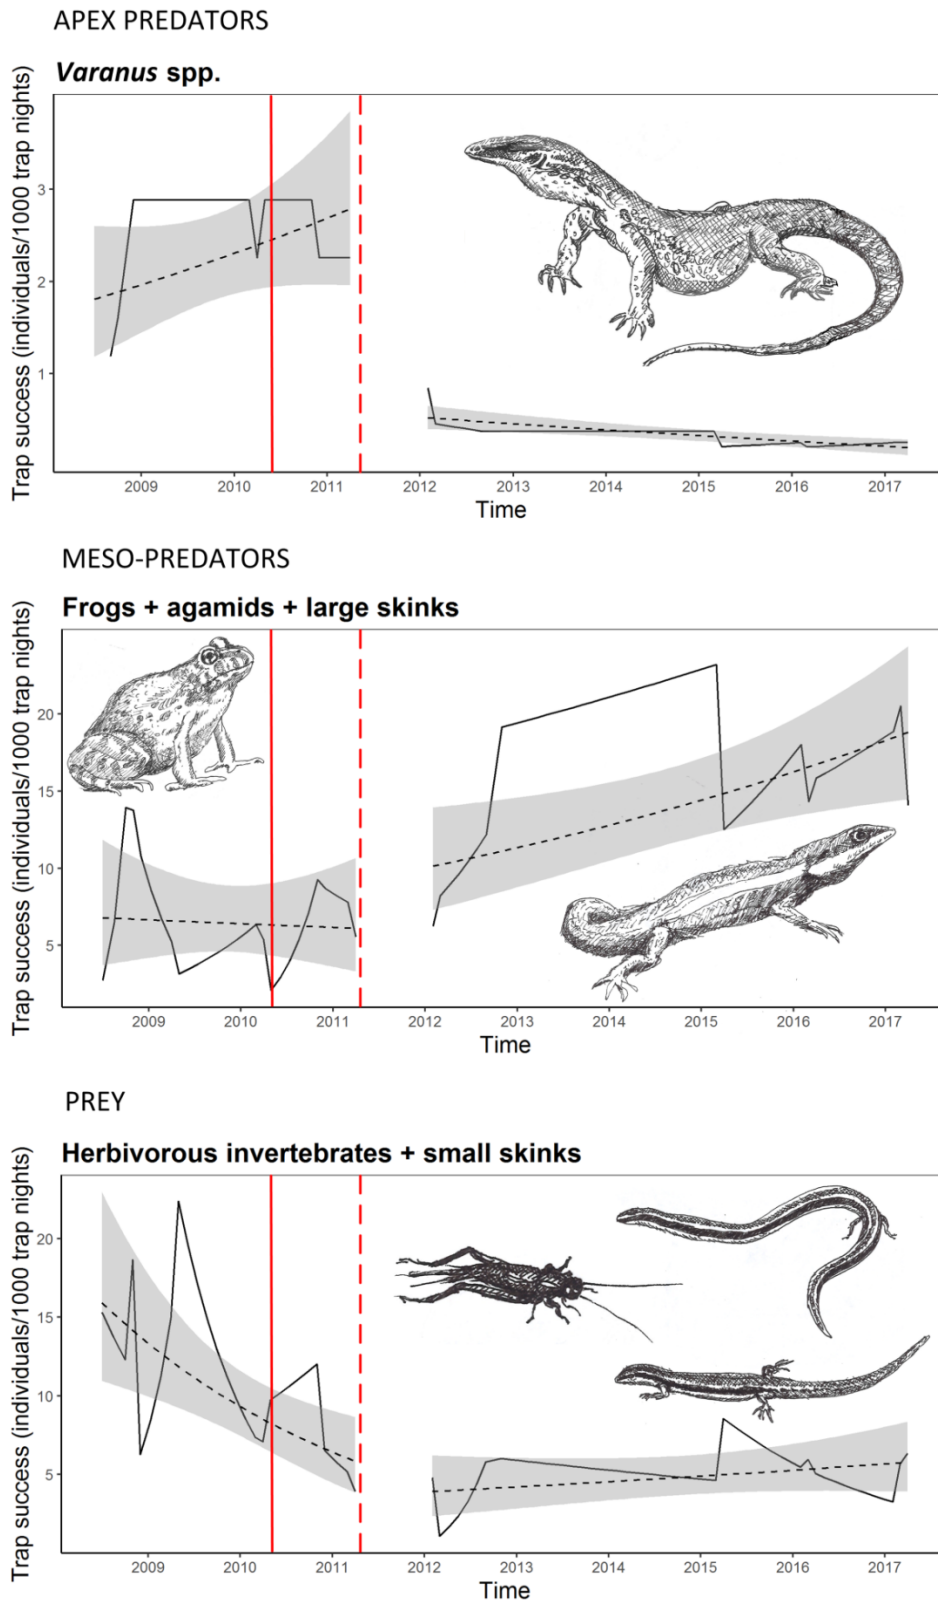

702

703 **Fig. 4.** Modelled trends in occurrence (trap success) before and after cane toad (*Rhinella marina*)  
704 invasion for apex predators (large varanid reptiles, *Varanus* spp.), meso-predators (frogs, agamids  
705 and large skinks), and prey groups (herbivorous invertebrates and small skinks) from Mirima fauna  
706 surveys. The vertical solid red line indicates the arrival date of toads in Kununurra in 2010 and the  
707 dashed red line indicates when toads arrived at fauna survey sites in 2011.

708 **Supporting Information**

709 **Table S1.** Mirima NP small mammal (Elliott traps, pit fall traps) and reptile, frog and invertebrate  
 710 (funnel traps) fauna survey site numbers, trap effort and site names during months when surveys  
 711 were conducted between 2006 and 2017. <sup>1</sup>Denotes the first month when cane toads (*Rhinella*  
 712 *marina*) were recorded in drop off points in Kununurra (Intervention 1). <sup>2</sup>Denotes when toads first  
 713 appeared in survey records at Mirima sites (Intervention 2).

| Year              | Month | Mammals   |             | Reptiles, Frogs, Invertebrates |             | Site names      |
|-------------------|-------|-----------|-------------|--------------------------------|-------------|-----------------|
|                   |       | No. sites | Trap effort | No. sites                      | Trap effort |                 |
| 2006              | Jul   | 3         | 336         | -                              | -           | m,n,o           |
| 2007              | Jan   | 2         | 224         | -                              | -           | m,n             |
| 2007              | Sep   | 1         | 112         | -                              | -           | o               |
| 2008              | May   | 1         | 112         | -                              | -           | o               |
| 2008              | Jul   | -         | -           | 3                              | 378         | a,b,c           |
| 2008              | Oct   | -         | -           | 2                              | 252         | a,b             |
| 2008              | Nov   | -         | -           | 6                              | 756         | c,d,e,f,g,h     |
| 2008              | Dec   | -         | -           | 2                              | 252         | i,j             |
| 2009              | Apr   | -         | -           | 7                              | 882         | a,b,d,e,f,g,j   |
| 2009              | May   | -         | -           | 3                              | 378         | c,h,i           |
| 2010              | Mar   | 7         | 432         | 7                              | 504         | a,b,d,e,f,g,h   |
| 2010 <sup>1</sup> | Apr   | 2         | 288         | 2                              | 144         | c,i             |
| 2010              | May   | 1         | 144         | 1                              | 72          | j               |
| 2010              | Nov   | 8         | 704         | 8                              | 576         | a,c,d,f,g,h,i,j |
| 2010              | Dec   | 2         | 176         | 2                              | 144         | b,e             |
| 2011              | Mar   | 7         | 616         | 7                              | 504         | a,b,c,d,g,i,j   |
| 2011 <sup>2</sup> | Apr   | 3         | 264         | 3                              | 216         | e,f,h           |
| 2012              | Feb   | 6         | 528         | 6                              | 432         | c,d,f,g,i,j     |
| 2012              | Mar   | 4         | 352         | 4                              | 288         | a,b,e,h         |
| 2012              | Sep   | 6         | 528         | 6                              | 432         | a,b,d,e,g,h     |
| 2012              | Nov   | 4         | 352         | 4                              | 288         | c,f,i,j         |
| 2015              | Mar   | 6         | 528         | 6                              | 432         | c,d,f,g,i,j     |
| 2015              | Apr   | 4         | 352         | 4                              | 288         | a,b,e,h         |
| 2016              | Feb   | 6         | 528         | 6                              | 432         | a,b,e,h,i,j     |
| 2016              | Mar   | 2         | 176         | 2                              | 144         | d,g             |
| 2016              | Apr   | 4         | 352         | 4                              | 288         | c,f,k,l         |
| 2017              | Feb   | 2         | 176         | 2                              | 144         | c,d             |
| 2017              | Mar   | 8         | 644         | 8                              | 616         | a,b,e,g,h,i,j,m |
| 2017              | Apr   | 2         | 176         | 2                              | 112         | n,f             |

714

715

716

**Table 1.** Level of significance (p-values) of intervention tests conducted at time of cane toad (*Rhinella marina*) invasion (Kununurra 2010, Darwin 2005, Katherine 2001) after fitting time series generalised linear models (INGARCH log-linear models with logarithmic link) on occurrence records of functional groups of apex predators, meso-predators and prey trophic levels at different sites.

| Trophic group         | Functional group                               | Study site                  |              |          |        |            |            |                             |              |          |        |            |            |                             |              |          |       |            |            |
|-----------------------|------------------------------------------------|-----------------------------|--------------|----------|--------|------------|------------|-----------------------------|--------------|----------|--------|------------|------------|-----------------------------|--------------|----------|-------|------------|------------|
|                       |                                                | Kununurra                   |              |          |        |            |            | Darwin                      |              |          |        |            |            | Katherine                   |              |          |       |            |            |
|                       |                                                | Intervention test (p-value) | Coefficients | Estimate | SE     | CI (lower) | CI (upper) | Intervention test (p-value) | Coefficients | Estimate | SE     | CI (lower) | CI (upper) | Intervention test (p-value) | Coefficients | Estimate | SE    | CI (lower) | CI (upper) |
| <i>Apex predators</i> |                                                |                             |              |          |        |            |            |                             |              |          |        |            |            |                             |              |          |       |            |            |
|                       | Anurophagous & snake eating elapids + varanids | 0.040*                      |              |          |        |            |            | 0.097 .                     |              |          |        |            |            | 0.085 .                     |              |          |       |            |            |
|                       |                                                |                             | (Intercept)  | -0.924   | 0.334  | -1.579     | -0.270     |                             | (Intercept)  | 5.323    | 0.914  | 3.531      | 7.115      |                             | (Intercept)  | 1.971    | 0.720 | 0.561      | 3.382      |
|                       |                                                |                             | beta_1       | -0.116   | 0.160  | -0.429     | 0.198      |                             | beta_1       | -0.684   | 0.287  | -1.246     | -0.121     |                             | beta_1       | 0.280    | 0.279 | -0.266     | 0.826      |
|                       |                                                |                             | alpha_6      | -0.884   | 0.109  | -1.097     | -0.671     |                             | Rain         | -0.024   | 0.168  | -0.354     | 0.306      |                             | Rain         | -0.107   | 0.255 | -0.608     | 0.393      |
|                       |                                                |                             | Rainmon      | 0.094    | 0.155  | -0.211     | 0.398      |                             | Intervention | -0.496   | 0.172  | -0.834     | -0.159     |                             | Intervention | -0.581   | 0.215 | -1.002     | -0.160     |
|                       |                                                |                             | Rain2mon     | -0.121   | 0.126  | -0.368     | 0.126      |                             |              |          |        |            |            |                             |              |          |       |            |            |
|                       |                                                |                             | Maxtemp      | -0.208   | 0.127  | -0.457     | 0.040      |                             |              |          |        |            |            |                             |              |          |       |            |            |
|                       |                                                |                             | Intervention | -1.503   | 0.495  | -2.472     | -0.533     |                             |              |          |        |            |            |                             |              |          |       |            |            |
| <i>Meso-predators</i> |                                                |                             |              |          |        |            |            |                             |              |          |        |            |            |                             |              |          |       |            |            |
|                       | Mammal-eating pythons                          | 0.031*                      |              |          |        |            |            | 0.029 *                     |              |          |        |            |            | 0.021*                      |              |          |       |            |            |
|                       |                                                |                             | (Intercept)  | 0.796    | 0.506  | -0.196     | 1.789      |                             | (Intercept)  | 2.382    | 0.256  | 1.881      | 2.883      |                             | (Intercept)  | 4.121    | 0.183 | 3.763      | 4.479      |
|                       |                                                |                             | beta_1       | -0.080   | 0.083  | -0.243     | 0.083      |                             | beta_1       | 0.486    | 0.049  | 0.391      | 0.581      |                             | beta_1       | -0.191   | 0.050 | -0.289     | -0.092     |
|                       |                                                |                             | alpha_6      | -0.864   | 0.061  | -0.983     | -0.744     |                             | Rain         | 0.334    | 0.051  | 0.234      | 0.435      |                             | Rain         | -0.294   | 0.117 | -0.523     | -0.065     |
|                       |                                                |                             | Rainmon      | 0.128    | 0.038  | 0.054      | 0.203      |                             | Intervention | 0.736    | 0.077  | 0.585      | 0.888      |                             | Intervention | 1.324    | 0.098 | 1.133      | 1.515      |
|                       |                                                |                             | Rain2mon     | 0.036    | 0.020  | -0.004     | 0.075      |                             |              |          |        |            |            |                             |              |          |       |            |            |
|                       |                                                |                             | Maxtemp      | -0.049   | 0.014  | -0.076     | -0.021     |                             |              |          |        |            |            |                             |              |          |       |            |            |
|                       |                                                |                             | Intervention | 0.894    | 0.319  | 0.269      | 1.518      |                             |              |          |        |            |            |                             |              |          |       |            |            |
|                       | Skink-eating elapids                           | < 0.001***                  |              |          |        |            |            | 0.006 **                    |              |          |        |            |            | 0.024*                      |              |          |       |            |            |
|                       |                                                |                             | (Intercept)  | 0.007    | 0.234  | -0.452     | 0.466      |                             | (Intercept)  | 1.308    | 0.378  | 0.567      | 2.050      |                             | (Intercept)  | 1.898    | 0.217 | 1.473      | 2.324      |
|                       |                                                |                             | beta_1       | 0.741    | 0.484  | -0.208     | 1.690      |                             | beta_1       | 0.075    | 0.099  | -0.118     | 0.269      |                             | beta_1       | 0.028    | 0.096 | -0.160     | 0.216      |
|                       |                                                |                             | alpha_6      | 0.240    | 0.255  | -0.261     | 0.740      |                             | Rain         | 0.719    | 0.173  | 0.380      | 1.058      |                             | Rain         | -1.065   | 0.188 | -1.433     | -0.696     |
|                       |                                                |                             | Rainmon      | 0.018    | 0.137  | -0.251     | 0.286      |                             | Intervention | 1.761    | 0.308  | 1.157      | 2.366      |                             | Intervention | 1.170    | 0.302 | 0.578      | 1.761      |
|                       |                                                |                             | Rain2mon     | 0.177    | 0.071  | 0.038      | 0.315      |                             |              |          |        |            |            |                             |              |          |       |            |            |
|                       |                                                |                             | Maxtemp      | -0.074   | 0.028  | -0.128     | -0.019     |                             |              |          |        |            |            |                             |              |          |       |            |            |
|                       |                                                |                             | Intervention | 1.127    | 0.597  | -0.042     | 2.297      |                             |              |          |        |            |            |                             |              |          |       |            |            |
|                       | Colubrids                                      | 0.018*                      |              |          |        |            |            | 0.017 *                     |              |          |        |            |            | 0.023*                      |              |          |       |            |            |
|                       |                                                |                             | (Intercept)  | -0.512   | 0.232  | -0.967     | -0.057     |                             | (Intercept)  | 2.338    | 0.2233 | 1.9        | 2.775      |                             | (Intercept)  | 3.608    | 0.312 | 2.997      | 4.220      |
|                       |                                                |                             | beta_1       | -0.416   | 0.232  | -0.871     | 0.039      |                             | beta_1       | 0.422    | 0.0465 | 0.331      | 0.513      |                             | beta_1       | -0.181   | 0.104 | -0.385     | 0.023      |
|                       |                                                |                             | alpha_6      | 0.567    | 0.189  | 0.196      | 0.937      |                             | Rain         | 0.004    | 0.0708 | -0.135     | 0.143      |                             | Rain         | 0.158    | 0.149 | -0.135     | 0.450      |
|                       |                                                |                             | Rainmon      | -0.155   | 0.235  | -0.616     | 0.307      |                             | Intervention | 0.775    | 0.1122 | 0.555      | 0.995      |                             | Intervention | 1.013    | 0.156 | 0.708      | 1.318      |
|                       |                                                |                             | Rain2mon     | 0.388    | 0.218  | -0.039     | 0.814      |                             |              |          |        |            |            |                             |              |          |       |            |            |
|                       |                                                |                             | Maxtemp      | -0.397   | 0.216  | -0.821     | 0.026      |                             |              |          |        |            |            |                             |              |          |       |            |            |
|                       |                                                |                             | Intervention | 0.573    | 0.206  | 0.168      | 0.977      |                             |              |          |        |            |            |                             |              |          |       |            |            |
|                       | Frogs + agamids + large skinks                 | 0.002**                     |              |          |        |            |            | NA                          |              |          |        |            |            | NA                          |              |          |       |            |            |
|                       |                                                |                             | (Intercept)  | 1.568    | 0.2727 | 1.0337     | 2.1025     |                             |              |          |        |            |            |                             |              |          |       |            |            |
|                       |                                                |                             | beta_1       | -0.148   | 0.0934 | -0.3306    | 0.0354     |                             |              |          |        |            |            |                             |              |          |       |            |            |
|                       |                                                |                             | alpha_6      | 0.176    | 0.1298 | -0.0783    | 0.4306     |                             |              |          |        |            |            |                             |              |          |       |            |            |
|                       |                                                |                             | Rainmon      | 0.329    | 0.16   | 0.0154     | 0.6427     |                             |              |          |        |            |            |                             |              |          |       |            |            |
|                       |                                                |                             | Rain2mon     | -0.193   | 0.1894 | -0.5639    | 0.1784     |                             |              |          |        |            |            |                             |              |          |       |            |            |
|                       |                                                |                             | Maxtemp      | 0.414    | 0.2182 | -0.0139    | 0.8413     |                             |              |          |        |            |            |                             |              |          |       |            |            |

|              |        |        |         |         |
|--------------|--------|--------|---------|---------|
| Vegcov       | 0.38   | 0.1591 | 0.6926  | 0.068   |
| Mthsincefire | -0.394 | 0.1297 | -0.6479 | -0.1394 |
| Intervention | 1.204  | 0.2067 | 0.7988  | 1.6089  |

Prey

|                                                |         |         |        |         |         |    |
|------------------------------------------------|---------|---------|--------|---------|---------|----|
| Small mammals                                  | 0.004** |         |        |         | NA      | NA |
| (Intercept)                                    |         | 0.0694  | 0.3972 | -0.7091 | 0.848   |    |
| beta_1                                         |         | 0.4546  | 0.0728 | 0.312   | 0.597   |    |
| alpha_6                                        |         | 0.5236  | 0.1078 | 0.3123  | 0.735   |    |
| Rainmon                                        |         | 0.3961  | 0.1328 | 0.1359  | 0.656   |    |
| Rain2mon                                       |         | 1.8181  | 0.201  | 1.4243  | 2.212   |    |
| Maxtemp                                        |         | 0.2302  | 0.097  | 0.0401  | 0.42    |    |
| Vegcov                                         |         | 0.5107  | 0.1852 | 0.1477  | 0.874   |    |
| Mthsincefire                                   |         | 1.671   | 0.1973 | 1.2843  | 2.058   |    |
| Intervention                                   |         | -0.4952 | 0.1146 | -0.7199 | -0.271  |    |
| Small skinks +<br>herbivorous<br>invertebrates | 0.008** |         |        |         | NA      | NA |
| (Intercept)                                    |         | 3.7939  | 1.12   | 1.599   | 5.9892  |    |
| beta_1                                         |         | -0.0948 | 0.133  | -0.355  | 0.1655  |    |
| alpha_12                                       |         | -0.4484 | 0.452  | -1.334  | 0.4368  |    |
| Rainmon                                        |         | -0.5768 | 0.244  | -1.055  | -0.0989 |    |
| Rain2mon                                       |         | -0.2592 | 0.215  | -0.68   | 0.1618  |    |
| Maxtemp                                        |         | 0.1146  | 0.137  | -0.154  | 0.383   |    |
| Vegcov                                         |         | -0.3628 | 0.176  | -0.708  | -0.0178 |    |
| Mthsincefire                                   |         | -0.1122 | 0.178  | -0.461  | 0.2368  |    |
| Intervention                                   |         | -1.3623 | 0.256  | -1.864  | -0.8603 |    |
| Carnivorous<br>invertebrates                   | 0.356   |         |        |         | NA      | NA |
| (Intercept)                                    |         | 3.6451  | 0.681  | 2.3096  | 4.9806  |    |
| beta_1                                         |         | 0.2222  | 0.13   | -0.0335 | 0.478   |    |
| alpha_12                                       |         | -0.7963 | 0.267  | -1.3202 | -0.2725 |    |
| Rainmon                                        |         | 0.4287  | 0.151  | 0.1329  | 0.7245  |    |
| Rain2mon                                       |         | 0.1868  | 0.168  | -0.1421 | 0.5157  |    |
| Maxtemp                                        |         | 0.5041  | 0.186  | 0.1405  | 0.8678  |    |
| Vegcov                                         |         | -0.1587 | 0.12   | -0.3936 | 0.0763  |    |
| Mthsincefire                                   |         | -0.0675 | 0.136  | -0.3331 | 0.1981  |    |
| Intervention                                   |         | -0.4245 | 0.191  | -0.7996 | -0.0494 |    |

Significance codes . 0.1, \* 0.05, \*\* 0.01, \*\*\* 0.001

**Table S2.** Snake, reptile and mammal species represented in callout and survey records from Kununurra (KNX, Mirima), Katherine (KAT) and Darwin (DAR). Fauna species and taxa are grouped according to predatory hierarchy (apex- and meso-predators and prey) and functional groupings within the conceptual model (see Fig. X). Numbers in bold are those for which intervention analyses were undertaken. Dietary information for reptile and frog species/genera was taken from Cogger (2014) and from Menkhorst and Knight (2011) for small mammals. Size of each species is the mean length of animals captured during wildlife removals/surveys, or if not measured, maximum length as recorded in Cogger (2014). \*Denotes the number of introduced cane toads collected at Kununurra drop-off points from April 2010 through to the end of 2013.

| Functional group                  | Species                         | Common name                       | SVL (cm) | Diet                                                   | KNX       | KAT        | DAR         | Mirima (KNX) |
|-----------------------------------|---------------------------------|-----------------------------------|----------|--------------------------------------------------------|-----------|------------|-------------|--------------|
| <b>APEX PREDATORS</b>             |                                 |                                   |          |                                                        |           |            |             |              |
| <b>Large-bodied/gaped elapids</b> | <i>Pseudechis australis</i>     | King brown, mulga                 | 139      | reptiles including snakes, frogs, small mammals        | <b>20</b> | <b>38</b>  | <b>28</b>   | 7            |
|                                   | <i>Pseudonaja nuchalis</i>      | Western brown, gwardar            | 106      | reptiles, small mammals, frogs                         | <b>28</b> | <b>68</b>  | <b>144</b>  | 7            |
|                                   | <i>Pseudonaja ingrami</i>       | Ingram's brown                    | 100      | vertebrates                                            | -         | 1          | -           | -            |
|                                   | <i>Pseudonaja textilis</i>      | Eastern brown                     | 200      | small mammals, reptiles                                | -         | 1          | -           | -            |
|                                   | <i>Pseudechis weigeli</i>       | Pygmy, speckled mulga             | 120      | vertebrates                                            | -         | <b>21</b>  | -           | 1            |
| <b>Varanids</b>                   | <i>Varanus gouldii</i>          | Sand monitor, Gould's monitor     | 113      | reptiles, insects, birds, mammals, frogs, carrion      | 6         | -          | -           | 16           |
|                                   | <i>Varanus acanthurus</i>       | Spiny tailed monitor              | 70       | lizards, insects                                       | -         | -          | -           | 6            |
|                                   | <i>Varanus mertensii</i>        | Merten's water monitor            | 65       | fish, frogs, carrion                                   | 4         | -          | -           | -            |
|                                   | <i>Varanus mitchellii</i>       | Mitchell's water monitor          | 35       | insects, fish, frogs                                   | -         | -          | -           | 1            |
|                                   | <i>Varanus scalaris</i>         | Spotted tree monitor              | 60       | insects, lizards                                       | -         | -          | -           | 1            |
|                                   | <i>Varanus tristis</i>          | Black headed monitor              | 60       | arboreal reptiles, insects                             | -         | -          | -           | 2            |
|                                   | <b>All varinids</b>             | goannas, monitors                 | 81       | reptiles, insects, birds, mammals, frogs, carrion      | <b>10</b> | -          | 6           | <b>26</b>    |
| <b>MESO-PREDATORS</b>             |                                 |                                   |          |                                                        |           |            |             |              |
| <b>Pythonids</b>                  | <i>Antaresia childreni</i>      | Childrens python                  | 60       | small mammals, birds, reptiles                         | <b>48</b> | <b>295</b> | <b>720</b>  | 2            |
|                                   | <i>Aspidites melanocephalus</i> | Black headed python               | 128      | small mammals, ground birds, reptiles, venomous snakes | <b>12</b> | <b>49</b>  | <b>27</b>   | -            |
|                                   | <i>Liasis fuscus</i>            | Water python                      | 141      | small mammals, other vertebrates                       | <b>24</b> | <b>51</b>  | <b>637</b>  | -            |
|                                   | <i>Liasis olivaceous</i>        | Olive python                      | 160      | small mammals, other vertebrates                       | <b>71</b> | <b>266</b> | <b>237</b>  | -            |
|                                   | <i>Morelia spilota</i>          | Carpet python                     | 162      | small mammals, terrestrial vertebrates                 | -         | -          | <b>993</b>  | -            |
| <b>Colubrids</b>                  | <i>Boiga irregularis</i>        | Night tiger, brown tree snake     | 98       | small mammal, birds, eggs, lizards                     | 5         | <b>183</b> | <b>297</b>  | -            |
|                                   | <i>Dendrelaphis punctulatus</i> | Common tree snake                 | 112      | semi-arboreal frogs, birds                             | <b>74</b> | <b>168</b> | <b>1094</b> | -            |
|                                   | <i>Stegonotus cucullatus</i>    | Slatey grey snake                 | 94       | lizards, small mammals                                 | -         | -          | <b>668</b>  | -            |
|                                   | <i>Tropidonophis mairii</i>     | keelback                          | 52       | frogs, semi-aquatic                                    | 6         | <b>59</b>  | <b>117</b>  | 1            |
| <b>Small-bodied/gaped Elapids</b> | <i>Acanthophis rugosus</i>      | Northern death adder              | 70       | lizards, small mammals                                 | -         | -          | 1           | 1            |
|                                   | <i>Brachyuropsis roperi</i>     | Northern shovel-nosed snake       | 25       | reptile eggs                                           | -         | 1          | -           | 11           |
|                                   | <i>Cryptophis pallidiceps</i>   | Secretive snake, small eyed snake | 50       | lizards, frogs                                         | -         | <b>21</b>  | <b>54</b>   | -            |
|                                   | <i>Demansia olivacea</i>        | Olive whip snake                  | 73       | lizards                                                | -         | 6          | 9           | 1            |
|                                   | <i>Demansia papuensis</i>       | Greater black whip snake          | 97       | lizards                                                | <b>21</b> | <b>100</b> | <b>71</b>   | 2            |
|                                   | <i>Demansia simplex</i>         | Grey whip snake                   | 60       | lizards                                                | -         | 1          | 3           | -            |
|                                   | <i>Demansia vestigiata</i>      | Lesser black whip snake           | 160      | lizards                                                | -         | <b>63</b>  | -           | -            |
|                                   | <i>Furina ornata</i>            | Orange-naped, moonsnake           | 36       | small skinks                                           | 9         | <b>30</b>  | -           | -            |
|                                   | <i>Suta punctata</i>            | Spotted snake                     | 38       | lizards                                                | -         | 5          | -           | 3            |
|                                   | <i>Vermicella</i> spp.          | Bandy bandy                       | 50       | blind snakes                                           | -         | 2          | -           | -            |
| <b>Acrochordids</b>               | <i>Acrochordus arafurae</i>     | Arafura file snake                | 150      | fish                                                   | -         | 2          | 2           | -            |
| <b>Typhlopids</b>                 | <i>Ramphotyphlops</i> spp.      | Blind snakes                      | 30       | ants, termites                                         | -         | -          | 1           | 2            |
| <b>Homalopsids</b>                | <i>Fordonia leucobalia</i>      | Crab eating snake                 | 100      | small fish, crabs                                      | -         | -          | 3           | -            |
| <b>Agamids</b>                    | <i>Chelosania brunnea</i>       | Chameleon dragon                  | 22       | invertebrates                                          | -         | -          | -           | 3            |

|                            |                                     |                                |    |                                  |        |   |   |             |
|----------------------------|-------------------------------------|--------------------------------|----|----------------------------------|--------|---|---|-------------|
|                            | <i>Diporiphora inungula</i>         | Yellow-eyed two-lined dragon   | 25 | invertebrates                    | -      | - | - | 92          |
|                            | <i>Diporiphora pindan</i>           | Pindan two-lined dragon        | 17 | invertebrates                    | -      | - | - | 61          |
|                            | <i>Lophognathus gilberti</i>        | Gilberts dragon                | 38 | invertebrates                    | -      | - | - | 14          |
|                            | <b>All <i>Diporiphora</i></b>       |                                |    |                                  |        |   |   | <b>153</b>  |
| <b>Large Scincids</b>      | <i>Ctenotus inornatus</i>           | Bar-shouldered ctenotus        | 19 | invertebrates                    | -      | - | - | 123         |
|                            | <i>Ctenotus pantherinus</i>         | Leopard ctenotus               | 27 | invertebrates                    | -      | - | - | 1           |
|                            | <i>Ctenotus piankai</i>             | Pianka's ctenotus              | 19 | invertebrates                    | -      | - | - | 5           |
|                            | <i>Ctenotus robustus</i>            | Robust ctenotus                | 24 | invertebrates                    | -      | - | - | 248         |
|                            | <i>Ctenotus tantillus</i>           | Kimberley wedge snout ctenotus | 18 | invertebrates                    | -      | - | - | 2           |
|                            | <b>All <i>Ctenotus</i></b>          |                                |    |                                  |        |   |   | <b>379</b>  |
|                            | <i>Eremiascincus isolepis</i>       | Northern bar-lipped skink      | 13 | invertebrates                    |        |   |   | 94          |
| <b>Gekkonids</b>           | <i>Heteronotia binoei</i>           | Binoe's gecko                  | 9  | invertebrates                    |        |   |   | 107         |
| <b>Anurans</b>             | <i>Crinia biligua</i>               | Bilingual froglet              | 4  | invertebrates                    | -      | - | - | 18          |
|                            | <i>Cyclorana</i> spp.               | Large terrestrial frogs        | 5  | invertebrates                    | -      | - | - | 40          |
|                            | <i>Litoria</i> spp.                 | Tree frogs                     | 4  | invertebrates                    | -      | - | - | 22          |
|                            | <i>Lymnodynastes convexiusculus</i> | Marbled frog                   | 4  | invertebrates                    | -      | - | - | 13          |
|                            | <i>Notadon melanoscapus</i>         | Northern spadefoot frog        | 4  | invertebrates                    | -      | - | - | 9           |
|                            | <i>Platyplectrum ornatum</i>        | Ornate frog                    | 3  | invertebrates                    | -      | - | - | <b>266</b>  |
|                            | <i>Uperoleia</i> spp.               | toadlets                       | 2  | invertebrates                    | -      | - | - | <b>131</b>  |
|                            | <b>All frogs</b>                    |                                |    |                                  |        |   |   | <b>487</b>  |
|                            | <i>Rhinella marina</i>              | Cane toad                      | 5  | invertebrates                    | 22623* | - | - | 205         |
| <b>PREY</b>                |                                     |                                |    |                                  |        |   |   |             |
| <b>Rodents</b>             | <i>Pseudomys delicatulus</i>        | Delicate mouse                 | 14 | seeds, plant matter, insects     | -      | - | - | 59          |
|                            | <i>Pseudomys nanus</i>              | Western chestnut mouse         | 26 | grass stems                      | -      | - | - | 10          |
|                            | <i>Rattus tunneyi</i>               | Pale field rat                 | 34 | vegetation                       | -      | - | - | 22          |
|                            | <i>Zyomys argurus</i>               | Common rock rat                | 24 | seeds, plant matter, insects     | -      | - | - | 8           |
| <b>Small Dasyurids</b>     | <i>Planigale ingrami</i>            | Long tailed planigale          | 12 | invertebrates, small vertebrates | -      | - | - | 5           |
|                            | <b>All small mammals</b>            |                                |    |                                  | -      | - | - | <b>104</b>  |
| <b>Small Scincids</b>      | <i>Carlia</i> spp.                  | Rainbow skinks                 | 11 | small invertebrates              | -      | - | - | <b>234</b>  |
|                            | <i>Lerista griffini</i>             | Stout sandslider               | 9  | ants, termites                   | -      | - | - | <b>269</b>  |
|                            | <i>Menetia greyii</i>               | Dwarf skink                    | 6  | small invertebrates              | -      | - | - | 6           |
|                            | <i>Morethia ruficauda</i>           | Fire-tail skink                | 8  | small invertebrates              | -      | - | - | 57          |
|                            | <i>Notoscincus ornatus</i>          | Ornate skink                   | 7  | small invertebrates              | -      | - | - | 31          |
|                            | <i>Proablepharus tenuis</i>         | Northern soil crevice skink    | 6  | small invertebrates              | -      | - | - | 2           |
|                            | <b>Tiny skinks (&lt; 8 cm)</b>      |                                |    |                                  |        |   |   | <b>96</b>   |
| <b>Large invertebrates</b> | Carnivorous invertebrates           |                                |    |                                  | -      | - | - | <b>806</b>  |
|                            | Herbivorous invertebrates           |                                |    |                                  | -      | - | - | <b>415</b>  |
|                            | Carabidae                           | Carabid beetles                | 3  | invertebrates, small vertebrates | -      | - | - | <b>379</b>  |
|                            | Chilopoda                           | Centipedes                     | 12 | invertebrates, small vertebrates | -      | - | - | <b>318</b>  |
|                            | Blattodea                           | Cockroaches                    | 2  | detritus, plant material         | -      | - | - | <b>254</b>  |
|                            | Gryllidae                           | Crickets                       | 2  | plant material                   | -      | - | - | <b>68</b>   |
|                            | Scorpiones                          | Scorpions                      | 5  | invertebrates                    | -      | - | - | <b>44</b>   |
|                            | Araneae                             | Spiders                        | 2  | invertebrates                    | -      | - | - | <b>61</b>   |
|                            | <b>All invertebrates</b>            |                                |    |                                  |        |   |   | <b>1221</b> |

**Table S3.** Covariates used in modelling of time series generalised linear models (INBARC) log-linear models with logarithmic link). Italics indicate name used in reporting of modelling results (Table 1, Table S3). All continuous variables were centred and standardised by dividing by two times the standard deviation [76].

| Parameter                                | Coding                               | Comment                                                                                                                                                               |
|------------------------------------------|--------------------------------------|-----------------------------------------------------------------------------------------------------------------------------------------------------------------------|
| <i>beta_1</i>                            | As defined in R package tscount [53] | 1 <sup>st</sup> order autoregressive term on previous observation in time series                                                                                      |
| <i>alpha_6, alpha_12</i>                 | As defined in R package tscount [53] | 6 <sup>th</sup> or 12 <sup>th</sup> order autoregressive term on 6-monthly or 12-monthly (respectively) previous mean in time series                                  |
| Intervention                             | As defined in R package tscount [53] | Intervention covariate for month of cane toad invasion in (1) Kununurra, May 2010; (2) Darwin, 2005; (3) Mirima, April 2011; (4) Katherine, 2001; (5) Katherine, 2005 |
| Maximum temperature ( <i>maxtemp</i> )   | Continuous, centred, standardised    | Mean maximum temperature (°C), monthly for Kununurra or Mirima, yearly for Darwin or Katherine                                                                        |
| Monthly rainfall ( <i>rainmon</i> )      | Continuous, centred, standardised    | Mean monthly rainfall (mm) for Kununurra or Mirima                                                                                                                    |
| Two-monthly rainfall ( <i>rain2mon</i> ) | Continuous, centred, standardised    | Mean rainfall over previous two months (mm) for Kununurra or Mirima                                                                                                   |
| Annual rainfall ( <i>rain</i> )          | Continuous, centred, standardised    | Mean annual rainfall (mm) for Darwin or Katherine                                                                                                                     |
| Time since fire ( <i>mthsincefire</i> )  | Integer, standardised                | Number of months since last fire, included as covariate in Mirima models                                                                                              |
| Vegetation cover ( <i>vegcov</i> )       | Integer, standardised                | Percentage cover of sub-canopy shrub and herbaceous vegetation, included as covariate in Mirima models                                                                |



**Table S4.** Time series generalised linear models (GLM) and generalised additive models with logarithmic link (from occurrence records of species/functional/trophic groups of apex, meso-predators and prey trophic levels at different sites. Model coefficient estimates, standard error (SE) and 95% confidence intervals (CI) are shown. Intervention effect at the time of cane toad invasion (and/or at a lagged time after cane toad invasion) is indicated as significantly negative (↓), significantly positive (↑), or non-significant (NS) and the time of intervention effect is given. For definitions of variables see Table S2.

| Study site | Trophic group  | Functional group/species        | Coefficients | Estimate | SE    | CI     |        | Intervention effect   |                       |
|------------|----------------|---------------------------------|--------------|----------|-------|--------|--------|-----------------------|-----------------------|
|            |                |                                 |              |          |       | Lower  | Upper  | At cane toad invasion | At lagged time        |
| Kununurra  |                |                                 |              |          |       |        |        |                       |                       |
|            | Apex predators |                                 |              |          |       |        |        |                       |                       |
|            |                | Anurophagous, snake-eating:     |              |          |       |        |        |                       |                       |
|            |                | <i>Pseudechis australis</i>     | (Intercept)  | -3.431   | 0.601 | -4.608 | -2.253 | ↓ May 2010            |                       |
|            |                |                                 | beta_1       | 0.375    | 0.223 | -0.062 | 0.812  |                       |                       |
|            |                |                                 | alpha_12     | -1.000   | 0.199 | -1.390 | -0.610 |                       |                       |
|            |                |                                 | Intervention | -1.084   | 0.606 | -2.272 | 0.104  |                       |                       |
|            |                | <i>Pseudonaja nuchalis</i>      | (Intercept)  | -0.244   | 0.726 | -1.667 | 1.178  | ↓ May 2010            |                       |
|            |                |                                 | beta_1       | 0.248    | 0.237 | -0.216 | 0.712  |                       |                       |
|            |                |                                 | alpha_12     | 0.671    | 0.420 | -0.153 | 1.494  |                       |                       |
|            |                |                                 | Maxtemp      | -0.255   | 0.272 | -0.789 | 0.279  |                       |                       |
|            |                |                                 | Intervention | -0.454   | 0.265 | -0.973 | 0.064  |                       |                       |
|            |                | <i>Varanus spp.</i>             | (Intercept)  | -3.995   | 0.805 | -5.571 | -2.418 | ↓ May 2010            | ↓ April 2011 (Mirima) |
|            |                |                                 | beta_1       | -0.087   | 0.458 | -0.985 | 0.811  |                       |                       |
|            |                |                                 | alpha_6      | -0.913   | 0.105 | -1.119 | -0.706 |                       |                       |
|            |                |                                 | Maxtemp      | -0.308   | 0.198 | -0.696 | 0.080  |                       |                       |
|            |                |                                 | Intervention | -3.034   | 1.382 | -5.742 | -0.326 |                       |                       |
|            | Meso-predators |                                 |              |          |       |        |        |                       |                       |
|            |                | Mammal-eating pythons:          |              |          |       |        |        |                       |                       |
|            |                | <i>Antaresia childreni</i>      | (Intercept)  | -0.857   | 0.542 | -1.920 | 0.206  | ↑ May 2010            |                       |
|            |                |                                 | beta_1       | -0.060   | 0.246 | -0.542 | 0.421  |                       |                       |
|            |                |                                 | alpha_12     | 0.467    | 0.315 | -0.151 | 1.084  |                       |                       |
|            |                |                                 | Rainmon      | 0.477    | 0.238 | 0.010  | 0.944  |                       |                       |
|            |                |                                 | Intervention | 0.465    | 0.324 | -0.170 | 1.100  |                       |                       |
|            |                | <i>Aspidites melanocephalus</i> | (Intercept)  | -8.407   | 1.693 | 11.725 | -5.089 | ↑ May 2010            |                       |
|            |                |                                 | beta_1       | 0.348    | 0.311 | -0.260 | 0.957  |                       |                       |
|            |                |                                 | alpha_6      | -1.000   | 0.089 | -1.174 | -0.826 |                       |                       |
|            |                |                                 | Rainmon      | 0.461    | 0.269 | -0.066 | 0.988  |                       |                       |
|            |                |                                 | Intervention | 1.889    | 1.534 | -1.117 | 4.895  |                       |                       |
|            |                | <i>Liasis fuscus</i>            | (Intercept)  | -1.051   | 0.536 | -2.103 | 0.000  | ↑ May 2010            |                       |
|            |                |                                 | beta_1       | -0.342   | 0.327 | -0.983 | 0.298  |                       |                       |
|            |                |                                 | alpha_12     | 0.784    | 0.126 | 0.538  | 1.030  |                       |                       |
|            |                |                                 | Rain2mon     | 0.569    | 0.242 | 0.094  | 1.044  |                       |                       |
|            |                |                                 | Maxtemp      | -0.528   | 0.246 | -1.010 | -0.047 |                       |                       |
|            |                |                                 | Intervention | 0.936    | 0.446 | 0.061  | 1.811  |                       |                       |
|            |                | <i>Liasis olivaceus</i>         | (Intercept)  | -0.167   | 0.162 | -0.485 | 0.150  | ↑ May 2010            |                       |
|            |                |                                 | beta_1       | 0.124    | 0.102 | -0.076 | 0.324  |                       |                       |
|            |                |                                 | alpha_12     | 0.760    | 0.173 | 0.422  | 1.098  |                       |                       |

|  |                                 |              | Intervention | 0.325 | 0.153  | 0.026  | 0.625 |               |              |
|--|---------------------------------|--------------|--------------|-------|--------|--------|-------|---------------|--------------|
|  | Skink-eating elapids:           |              |              |       |        |        |       |               |              |
|  | <i>Demansia papuensis</i>       | (Intercept)  | -1.088       | 0.537 | -2.141 | -0.036 |       | ↑ May 2010    |              |
|  |                                 | beta_1       | -0.030       | 0.222 | -0.466 | 0.406  |       |               |              |
|  |                                 | alpha_6      | 0.627        | 0.179 | 0.277  | 0.977  |       |               |              |
|  |                                 | Rain2mon     | 0.374        | 0.305 | -0.224 | 0.971  |       |               |              |
|  |                                 | Maxtemp      | -0.846       | 0.428 | -1.685 | -0.008 |       |               |              |
|  |                                 | Intervention | 1.514        | 0.358 | 0.812  | 2.216  |       |               |              |
|  | <i>Furina ornata</i>            | (Intercept)  | -8.525       | 1.776 | 12.006 | -5.043 |       | ↑ May 2010    |              |
|  |                                 | beta_1       | 0.437        | 0.301 | -0.154 | 1.027  |       |               |              |
|  |                                 | alpha_6      | -0.946       | 0.117 | -1.175 | -0.716 |       |               |              |
|  |                                 | Rainmon      | 0.370        | 0.182 | 0.014  | 0.726  |       |               |              |
|  |                                 | Intervention | 3.323        | 1.382 | 0.613  | 6.032  |       |               |              |
|  | Arboreal colubrids:             |              |              |       |        |        |       |               |              |
|  | <i>Dendrelaphis punctulatus</i> | (Intercept)  | -1.041       | 0.243 | -1.516 | -0.566 |       | ↑ May 2010    |              |
|  |                                 | beta_1       | -0.263       | 0.279 | -0.810 | 0.284  |       |               |              |
|  |                                 | Maxtemp      | -0.382       | 0.238 | -0.849 | 0.085  |       |               |              |
|  |                                 | Intervention | 0.723        | 0.280 | 0.174  | 1.271  |       |               |              |
|  | <i>Boiga irregularis</i>        | (Intercept)  | -9.663       | 1.676 | 12.947 | -6.379 |       | ↑ May 2010    |              |
|  |                                 | beta_1       | 0.859        | 0.108 | 0.648  | 1.071  |       |               |              |
|  |                                 | alpha_6      | -0.822       | 0.098 | -1.013 | -0.631 |       |               |              |
|  |                                 | Intervention | 2.507        | 1.265 | 0.026  | 4.987  |       |               |              |
|  | <i>Tropidonophis mairii</i>     | (Intercept)  | -7.878       | 1.622 | 11.057 | -4.700 |       | ↑ May 2010    |              |
|  |                                 | beta_1       | -0.009       | 0.246 | -0.491 | 0.472  |       |               |              |
|  |                                 | alpha_6      | -0.991       | 0.141 | -1.267 | -0.714 |       |               |              |
|  |                                 | Rain2mon     | 0.043        | 0.128 | -0.208 | 0.295  |       |               |              |
|  |                                 | Intervention | 1.854        | 1.430 | -0.949 | 4.657  |       |               |              |
|  | Frogs:                          |              |              |       |        |        |       |               |              |
|  | <i>Uperoleia</i>                | (Intercept)  | -0.896       | 0.428 | -1.735 | -0.058 |       | NS April 2010 | ↑ April 2011 |
|  |                                 | beta_1       | -1.000       | 0.382 | -1.749 | -0.251 |       |               |              |
|  |                                 | Rainmon      | 1.741        | 0.467 | 0.825  | 2.657  |       |               |              |
|  |                                 | Vegcov       | 0.730        | 0.341 | 0.062  | 1.397  |       |               |              |
|  |                                 | Intervention | 1.705        | 0.496 | 0.734  | 2.677  |       |               |              |
|  | <i>Platyplectrum ornatum</i>    | (Intercept)  | -1.310       | 0.459 | -2.210 | -0.406 |       | NS April 2010 | ↑ April 2011 |
|  |                                 | Vegcov       | -2.360       | 0.616 | -3.570 | -1.153 |       |               |              |
|  |                                 | Mthsincefire | -1.060       | 0.364 | -1.770 | -0.349 |       |               |              |
|  |                                 | Intervention | 1.780        | 0.443 | 0.910  | 2.644  |       |               |              |
|  | Agamids                         | (Intercept)  | -0.458       | 0.463 | -1.365 | 0.449  |       | ↑ April 2010  | ↑ April 2011 |
|  |                                 | beta_1       | 0.304        | 0.269 | -0.223 | 0.830  |       |               |              |

|        |                                                                           |              | Intervention | 0.788 | 0.493  | -0.179 | 1.755         |               |  |
|--------|---------------------------------------------------------------------------|--------------|--------------|-------|--------|--------|---------------|---------------|--|
|        | Large skinks:                                                             |              |              |       |        |        |               |               |  |
|        | Large <i>Ctenotus</i> spp.                                                | (Intercept)  | 0.283        | 0.251 | -0.209 | 0.776  | NS April 2010 | ↑ April 2011  |  |
|        |                                                                           | Maxtemp      | 0.521        | 0.313 | -0.093 | 1.135  |               |               |  |
|        |                                                                           | Vegcov       | -0.831       | 0.295 | -1.410 | -0.253 |               |               |  |
|        |                                                                           | Intervention | 1.105        | 0.303 | 0.511  | 1.699  |               |               |  |
|        | <i>Eremiascincus isolepis</i>                                             | (Intercept)  | 0.001        | 0.654 | -1.281 | 1.283  | NS April 2010 | NS April 2011 |  |
|        |                                                                           | beta_1       | -0.264       | 0.385 | -1.018 | 0.491  |               |               |  |
|        |                                                                           | alpha_12     | -0.625       | 0.446 | -1.499 | 0.249  |               |               |  |
|        |                                                                           | Rainmon      | 0.916        | 0.496 | -0.056 | 1.889  |               |               |  |
|        |                                                                           | Maxtemp      | 1.149        | 0.627 | -0.080 | 2.378  |               |               |  |
|        |                                                                           | Intervention | -0.230       | 0.488 | -1.187 | 0.727  |               |               |  |
|        | <i>Heteronotia binoei</i>                                                 | (Intercept)  | -0.729       | 0.590 | -1.886 | 0.427  | NS April 2010 | NS April 2011 |  |
|        |                                                                           | beta_1       | 0.131        | 0.244 | -0.346 | 0.609  |               |               |  |
|        |                                                                           | alpha_12     | -0.469       | 0.363 | -1.180 | 0.242  |               |               |  |
|        |                                                                           | Rainmon      | -1.128       | 0.495 | -2.098 | -0.159 |               |               |  |
|        |                                                                           | Maxtemp      | -0.685       | 0.357 | -1.385 | 0.015  |               |               |  |
|        |                                                                           | Vegcov       | 0.626        | 0.399 | -0.155 | 1.408  |               |               |  |
|        |                                                                           | Intervention | 0.818        | 0.479 | -0.120 | 1.756  |               |               |  |
|        | Crocodile:                                                                |              |              |       |        |        |               |               |  |
|        | <i>Crocodylus johnsoni</i>                                                | (Intercept)  | -3.319       | 0.712 | -4.713 | -1.920 | ↑ May 2010    | ↑ April 2011  |  |
|        |                                                                           | Rainmon      | 0.787        | 0.331 | 0.139  | 1.440  |               |               |  |
|        |                                                                           | Intervention | 1.507        | 0.753 | 0.031  | 2.980  |               |               |  |
| Prey   |                                                                           |              |              |       |        |        |               |               |  |
|        | <i>Lerista griffini</i>                                                   | (Intercept)  | 0.778        | 0.317 | 0.157  | 1.399  | ↓ April 2010  | ↓ April 2011  |  |
|        |                                                                           | Rainmon      | -1.937       | 0.733 | -3.374 | -0.501 |               |               |  |
|        |                                                                           | Rain2mon     | -1.127       | 0.601 | -2.304 | 0.051  |               |               |  |
|        |                                                                           | Vegcov       | 0.638        | 0.337 | -0.023 | 1.299  |               |               |  |
|        |                                                                           | Intervention | -0.909       | 0.290 | -1.478 | -0.340 |               |               |  |
|        | <i>Carlia</i> spp.                                                        | (Intercept)  | -2.553       | 0.822 | -4.163 | -0.942 | ↑ April 2010  | ↑ April 2011  |  |
|        |                                                                           | beta_1       | -0.214       | 0.295 | -0.792 | 0.363  |               |               |  |
|        |                                                                           | alpha_12     | -0.786       | 0.365 | -1.500 | -0.071 |               |               |  |
|        |                                                                           | Rainmon      | -0.912       | 0.559 | -2.007 | 0.184  |               |               |  |
|        |                                                                           | Mthsincefire | -1.028       | 0.476 | -1.960 | -0.095 |               |               |  |
|        |                                                                           | Intervention | 2.380        | 0.650 | 1.106  | 3.653  |               |               |  |
|        | Tiny skinks ( <i>Menetia</i> , <i>Morethia</i> , <i>Notoscincus</i> spp.) | (Intercept)  | -0.199       | 0.519 | -1.220 | 0.819  | ↓ April 2010  | ↓ April 2011  |  |
|        |                                                                           | alpha_12     | -0.642       | 0.448 | -1.520 | 0.236  |               |               |  |
|        |                                                                           | Rainmon      | -1.489       | 0.766 | -2.990 | 0.011  |               |               |  |
|        |                                                                           | Intervention | -0.998       | 0.561 | -2.100 | 0.103  |               |               |  |
| Darwin |                                                                           |              |              |       |        |        |               |               |  |
|        | Apex predators                                                            |              |              |       |        |        |               |               |  |
|        | Anurophagous, snake-eating:                                               |              |              |       |        |        |               |               |  |

|  |                |                                 |              |        |       |        |        |        |  |
|--|----------------|---------------------------------|--------------|--------|-------|--------|--------|--------|--|
|  |                |                                 | (Intercept)  | 1.722  | 0.214 | 1.300  | 2.141  | ↓ 2005 |  |
|  |                |                                 | Rain         | -0.528 | 0.391 | -1.300 | 0.239  |        |  |
|  |                |                                 | Intervention | -1.604 | 0.463 | -2.510 | -0.697 |        |  |
|  |                |                                 |              |        |       |        |        |        |  |
|  |                | <i>Pseudonaja nuchalis</i>      | (Intercept)  | 2.963  | 0.148 | 2.672  | 3.254  | ↓ 2005 |  |
|  |                |                                 | Rain         | 0.093  | 0.205 | -0.309 | 0.496  |        |  |
|  |                |                                 | Intervention | -0.309 | 0.199 | -0.699 | 0.082  |        |  |
|  |                |                                 |              |        |       |        |        |        |  |
|  | Meso-predators |                                 |              |        |       |        |        |        |  |
|  |                | Mammal-eating pythons:          |              |        |       |        |        |        |  |
|  |                | <i>Antaresia childreni</i>      | (Intercept)  | 6.800  | 1.230 | 4.389  | 9.212  | ↑ 2005 |  |
|  |                |                                 | beta_1       | -0.658 | 0.301 | -1.248 | -0.068 |        |  |
|  |                |                                 | Rain         | -0.113 | 0.096 | -0.302 | 0.075  |        |  |
|  |                |                                 | Intervention | 0.716  | 0.149 | 0.424  | 1.007  |        |  |
|  |                |                                 |              |        |       |        |        |        |  |
|  |                | <i>Aspidites melanocephalus</i> | (Intercept)  | 0.198  | 0.452 | -0.688 | 1.080  | ↑ 2005 |  |
|  |                |                                 | Rain         | 0.192  | 0.431 | -0.653 | 1.040  |        |  |
|  |                |                                 | Intervention | 1.296  | 0.503 | 0.310  | 2.280  |        |  |
|  |                |                                 |              |        |       |        |        |        |  |
|  |                | <i>Liasis fuscus</i>            | (Intercept)  | 6.642  | 0.687 | 5.296  | 7.988  | ↑ 2005 |  |
|  |                |                                 | beta_1       | -0.800 | 0.191 | -1.174 | -0.427 |        |  |
|  |                |                                 | Rain         | -0.124 | 0.093 | -0.306 | 0.059  |        |  |
|  |                |                                 | Intervention | 1.375  | 0.172 | 1.038  | 1.713  |        |  |
|  |                |                                 |              |        |       |        |        |        |  |
|  |                | <i>Liasis olivaceus</i>         | (Intercept)  | 2.895  | 0.119 | 2.662  | 3.127  | ↑ 2005 |  |
|  |                |                                 | Rain         | -0.047 | 0.147 | -0.335 | 0.241  |        |  |
|  |                |                                 | Intervention | 0.598  | 0.144 | 0.316  | 0.879  |        |  |
|  |                |                                 |              |        |       |        |        |        |  |
|  |                | <i>Morelia spilota</i>          | (Intercept)  | 5.427  | 0.577 | 4.296  | 6.558  | ↑ 2005 |  |
|  |                |                                 | beta_1       | -0.447 | 0.159 | -0.760 | -0.135 |        |  |
|  |                |                                 | Rain         | -0.346 | 0.119 | -0.579 | -0.113 |        |  |
|  |                |                                 | Intervention | 1.848  | 0.224 | 1.409  | 2.287  |        |  |
|  |                |                                 |              |        |       |        |        |        |  |
|  |                | Skink-eating elapids:           |              |        |       |        |        |        |  |
|  |                | <i>Cryptophis pallidiceps</i>   | (Intercept)  | 1.174  | 0.280 | 0.626  | 1.720  | ↑ 2005 |  |
|  |                |                                 | Rain         | 0.045  | 0.308 | -0.559 | 0.650  |        |  |
|  |                |                                 | Intervention | 0.934  | 0.324 | 0.299  | 1.570  |        |  |
|  |                |                                 |              |        |       |        |        |        |  |
|  |                | <i>Demansia papuensis</i>       | (Intercept)  | 1.604  | 0.226 | 1.162  | 2.050  | ↑ 2005 |  |
|  |                |                                 | Rain         | 0.049  | 0.266 | -0.473 | 0.570  |        |  |
|  |                |                                 | Intervention | 0.722  | 0.269 | 0.195  | 1.250  |        |  |
|  |                |                                 |              |        |       |        |        |        |  |
|  |                | <i>Furina ornata</i>            | (Intercept)  | 2.111  | 0.478 | 1.174  | 3.047  | ↑ 2005 |  |
|  |                |                                 | beta_1       | -0.855 | 0.334 | -1.509 | -0.201 |        |  |
|  |                |                                 | Rain         | 0.010  | 0.346 | -0.669 | 0.689  |        |  |
|  |                |                                 | Intervention | 1.664  | 0.408 | 0.864  | 2.463  |        |  |
|  |                |                                 |              |        |       |        |        |        |  |
|  |                | Arboreal colubrids:             |              |        |       |        |        |        |  |
|  |                | <i>Dendrelaphis punctulatus</i> | (Intercept)  | 4.265  | 0.060 | 4.147  | 4.382  | ↑ 2005 |  |
|  |                |                                 | Rain         | -0.378 | 0.074 | -0.523 | -0.232 |        |  |

|           |                |                                 | Intervention | 0.783  | 0.070 | 0.645  | 0.920  |         |        |
|-----------|----------------|---------------------------------|--------------|--------|-------|--------|--------|---------|--------|
|           |                | <i>Boiga irregularis</i>        | (Intercept)  | 2.637  | 0.135 | 2.373  | 2.902  | ↑ 2005  |        |
|           |                |                                 | Rain         | -0.221 | 0.141 | -0.498 | 0.055  |         |        |
|           |                |                                 | Intervention | 1.220  | 0.151 | 0.924  | 1.516  |         |        |
|           |                | <i>Tropidonophis mairii</i>     | (Intercept)  | 0.765  | 0.336 | 0.107  | 1.422  | ↑ 2005  |        |
|           |                |                                 | Rain         | 0.316  | 0.207 | -0.090 | 0.721  |         |        |
|           |                |                                 | Intervention | 2.326  | 0.350 | 1.640  | 3.011  |         |        |
|           |                | <i>Stegonotus cucullatus</i>    | (Intercept)  | 4.666  | 0.457 | 3.770  | 5.562  | ↑ 2005  |        |
|           |                |                                 | beta_1       | -0.696 | 0.184 | -1.060 | -0.334 |         |        |
|           |                |                                 | Rain         | -0.705 | 0.196 | -1.090 | -0.322 |         |        |
|           |                |                                 | Intervention | 3.207  | 0.399 | 2.430  | 3.988  |         |        |
| Katherine |                |                                 |              |        |       |        |        |         |        |
|           | Apex predators |                                 |              |        |       |        |        |         |        |
|           |                | Anurophagous, snake-eating:     |              |        |       |        |        |         |        |
|           |                | <i>Pseudechis australis</i>     | (Intercept)  | 0.239  | 1.144 | -2.004 | 2.482  | ↓ 2001  |        |
|           |                |                                 | beta_1       | 0.838  | 0.589 | -0.317 | 1.994  |         |        |
|           |                |                                 | Rain         | -0.827 | 0.516 | -1.839 | 0.184  |         |        |
|           |                |                                 | Intervention | -2.310 | 1.266 | -4.791 | 0.170  |         |        |
|           |                | <i>Pseudonaja nuchalis</i>      | (Intercept)  | 2.869  | 0.655 | 1.590  | 4.153  | ↓ 2001  |        |
|           |                |                                 | beta_1       | -0.376 | 0.335 | -1.030 | 0.281  |         |        |
|           |                |                                 | Intervention | -0.515 | 0.250 | -1.010 | -0.025 |         |        |
|           | Meso-predators |                                 |              |        |       |        |        |         |        |
|           |                | Mammal-eating pythons:          |              |        |       |        |        |         |        |
|           |                | <i>Antaresia childreni</i>      | (Intercept)  | 3.438  | 0.200 | 3.046  | 3.830  | ↑ 2001  | ↑ 2005 |
|           |                |                                 | beta_1       | -0.283 | 0.073 | -0.426 | -0.141 |         |        |
|           |                |                                 | Rain         | -0.813 | 0.147 | -1.101 | -0.526 |         |        |
|           |                |                                 | Intervention | 1.130  | 0.143 | 0.850  | 1.411  |         |        |
|           |                | <i>Aspidites melanocephalus</i> | (Intercept)  | 0.219  | 0.404 | -0.573 | 1.011  | ↑ 2001  | ↑ 2005 |
|           |                |                                 | beta_1       | -0.591 | 0.145 | -0.876 | -0.306 |         |        |
|           |                |                                 | Rain         | -2.641 | 0.685 | -3.983 | -1.298 |         |        |
|           |                |                                 | Intervention | 2.348  | 0.420 | 1.525  | 3.171  |         |        |
|           |                | <i>Liasis fuscus</i>            | (Intercept)  | 1.047  | 0.377 | 0.308  | 1.786  | ↑ 2001  | ↑ 2005 |
|           |                |                                 | beta_1       | -0.333 | 0.292 | -0.906 | 0.239  |         |        |
|           |                |                                 | Intervention | 1.553  | 0.404 | 0.760  | 2.346  |         |        |
|           |                | <i>Liasis olivaceus</i>         | (Intercept)  | 2.090  | 0.186 | 1.724  | 2.454  | ↑ 2001  | ↑ 2005 |
|           |                |                                 | Rain         | -1.090 | 0.164 | -1.413 | -0.768 |         |        |
|           |                |                                 | Intervention | 1.230  | 0.192 | 0.855  | 1.607  |         |        |
|           |                | Skink-eating elapids:           |              |        |       |        |        |         |        |
|           |                | <i>Cryptophis pallidiceps</i>   | (Intercept)  | -1.838 | 1.004 | -3.810 | 0.129  | NS 2001 | ↑ 2005 |
|           |                |                                 | Rain         | -0.794 | 0.584 | -1.940 | 0.352  |         |        |

|  |                                 |              | Intervention | 3.135 | 1.025  | 1.130  | 5.143 |         |        |
|--|---------------------------------|--------------|--------------|-------|--------|--------|-------|---------|--------|
|  | <i>Demansia papuensis</i>       | (Intercept)  | -2.316       | 1.023 | -4.321 | -0.312 |       | ↑ 2001  | ↑ 2005 |
|  |                                 | beta_1       | -0.175       | 0.088 | -0.346 | -0.003 |       |         |        |
|  |                                 | Rain         | -2.506       | 0.570 | -3.622 | -1.390 |       |         |        |
|  |                                 | Intervention | 5.226        | 1.036 | 3.196  | 7.255  |       |         |        |
|  | <i>Demansia vestigiata</i>      | (Intercept)  | 1.611        | 0.374 | 0.879  | 2.344  |       | NS 2001 | ↓ 2005 |
|  |                                 | beta_1       | 0.318        | 0.150 | 0.023  | 0.612  |       |         |        |
|  |                                 | Intervention | -2.634       | 0.697 | -4.000 | -1.267 |       |         |        |
|  | <i>Furina ornata</i>            | (Intercept)  | 0.030        | 0.396 | -0.747 | 0.807  |       | ↑ 2001  | ↑ 2005 |
|  |                                 | Rain         | -1.215       | 0.531 | -2.256 | -0.173 |       |         |        |
|  |                                 | Intervention | 1.320        | 0.432 | 0.474  | 2.166  |       |         |        |
|  | <i>Pseudechis weigeli</i>       | (Intercept)  | -0.025       | 0.370 | -0.751 | 0.700  |       | ↑ 2001  | ↑ 2005 |
|  |                                 | Rain         | -1.146       | 0.725 | -2.568 | 0.276  |       |         |        |
|  |                                 | Intervention | 1.118        | 0.470 | 0.197  | 2.038  |       |         |        |
|  | Arboreal colubrids:             |              |              |       |        |        |       |         |        |
|  | <i>Dendrelaphis punctulatus</i> | (Intercept)  | 1.580        | 0.298 | 0.996  | 2.164  |       | ↑ 2001  | ↑ 2005 |
|  |                                 | beta_1       | -0.602       | 0.247 | -1.085 | -0.118 |       |         |        |
|  |                                 | Rain         | -0.476       | 0.200 | -0.868 | -0.084 |       |         |        |
|  |                                 | Intervention | 3.168        | 0.722 | 1.752  | 4.584  |       |         |        |
|  | <i>Boiga irregularis</i>        | (Intercept)  | 3.257        | 0.341 | 2.590  | 3.925  |       | ↑ 2001  | ↑ 2005 |
|  |                                 | beta_1       | -0.381       | 0.144 | -0.664 | -0.098 |       |         |        |
|  |                                 | Rain         | -0.617       | 0.173 | -0.955 | -0.278 |       |         |        |
|  |                                 | Intervention | 0.977        | 0.188 | 0.609  | 1.345  |       |         |        |
|  | <i>Tropidonophis mairii</i>     | (Intercept)  | 0.669        | 0.288 | 0.104  | 1.233  |       | ↑ 2001  | ↑ 2005 |
|  |                                 | Rain         | -1.123       | 0.370 | -1.848 | -0.398 |       |         |        |
|  |                                 | Intervention | 1.395        | 0.314 | 0.779  | 2.010  |       |         |        |

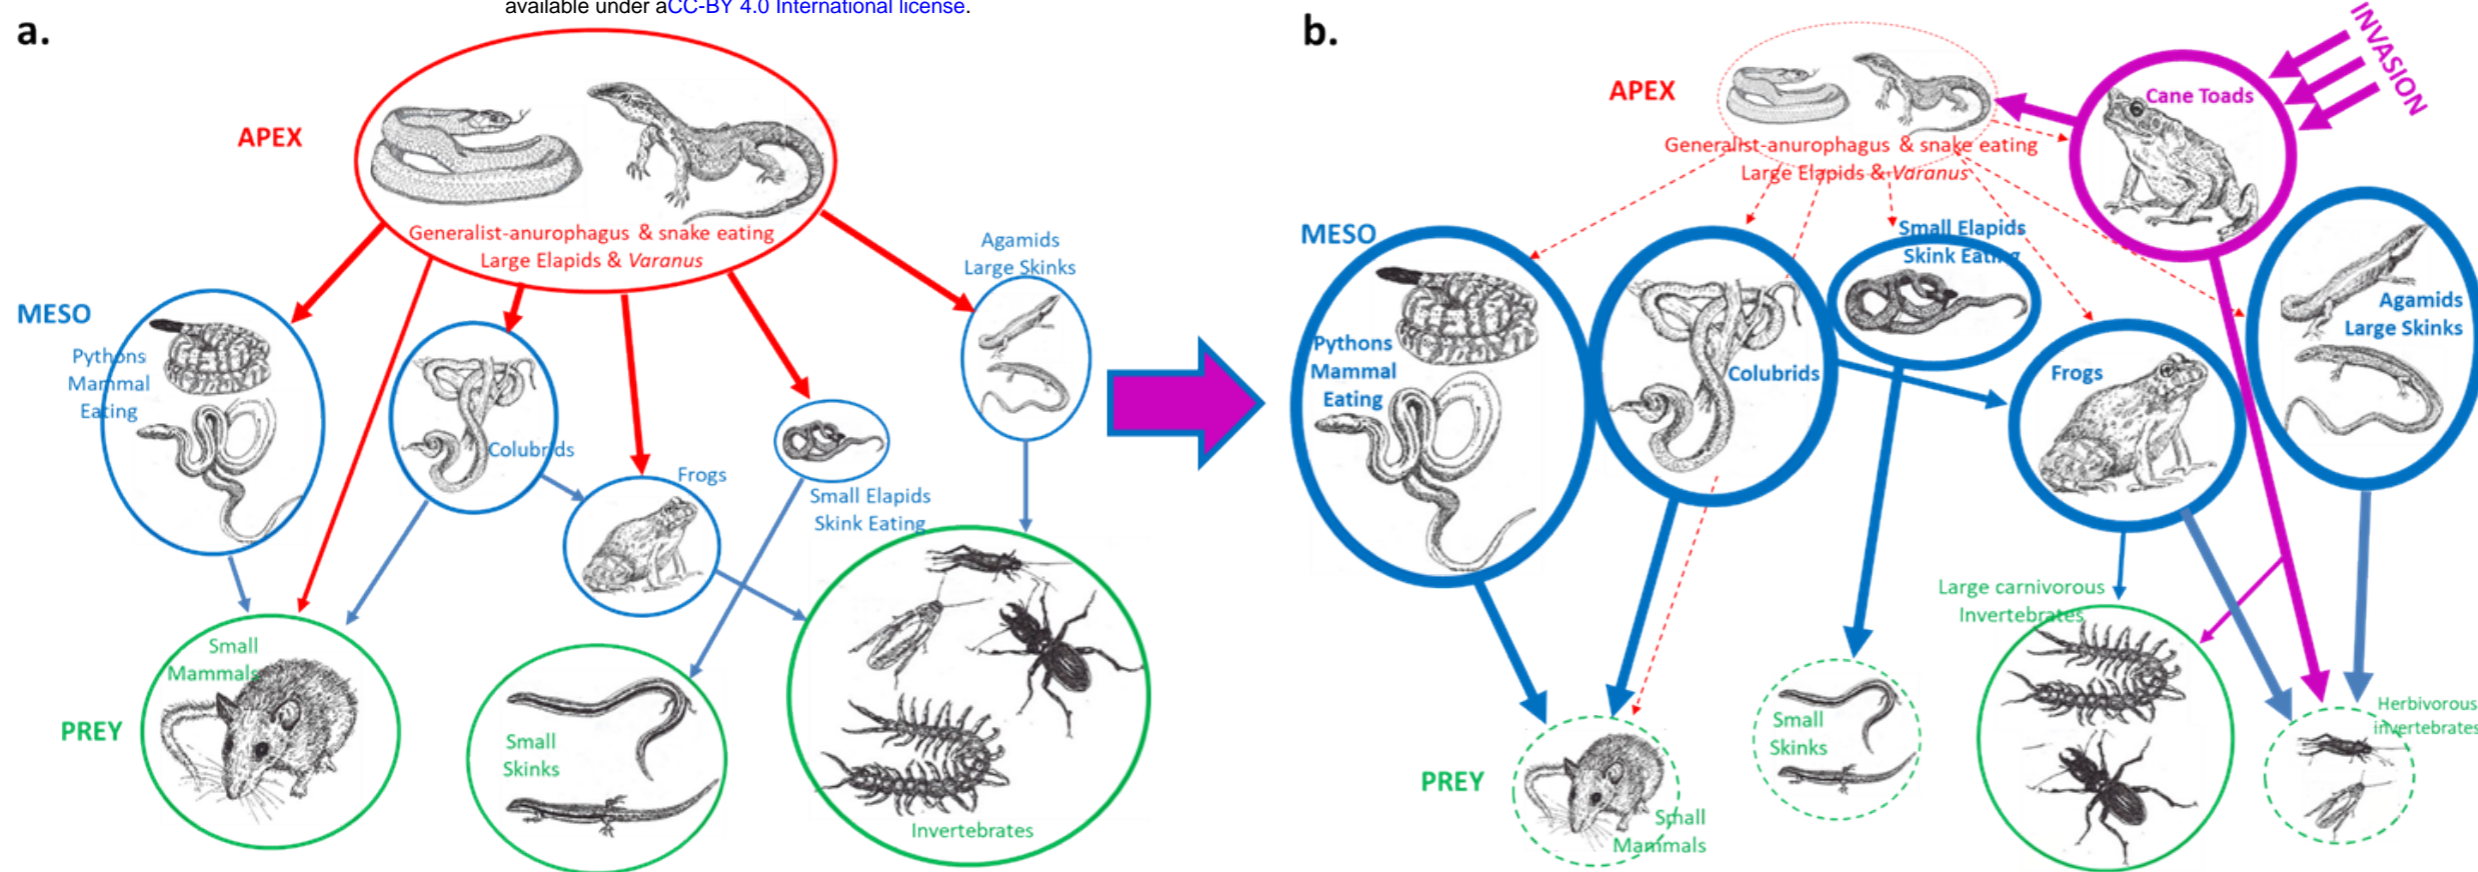

**Fig. 1.** A conceptual model predicting changes in trophic interactions among terrestrial savanna fauna with the arrival of cane toads (*Rhinella marina*) in savannas adjacent to Kununurra. Savanna apex reptilian predators include large elapid snakes (e.g. *Pseudechis australis*) and varanid lizards (*Varanus gouldii*). Meso-predatory reptiles include mammal-eating snakes such as pythons (e.g. *Aspidites melanocephalus* and *Liasis olivaceus*), colubrid snakes (e.g. *Dendrelaphus punctulatus*) and small skink-eating elapids (e.g. *Furina ornata*). Other savanna meso-predators include frogs (e.g. *Platyplectrum ornatum*), large scincids (e.g. *Ctenotus robustus*) and agamids (*Lophognathus gilberti*). Arrow thickness represents the strength of the interactions between trophic levels (apex and meso-predators and prey species). Thin, dashed lines or arrows indicate putative declines or weakened interactions. Violet arrows/lines represent interactions with the invasive cane toad, red lines/arrows represent apex predators and their interactions, blue lines/arrows meso-predators and their interactions, and green lines are key savanna prey species/groups. **a)** Represents a conceptual model of trophic interactions in savanna ecosystems prior to cane toad invasion. Pre-invasion reptilian and amphibian assemblages were dominated by the apex predators, which were the large-gaped anurophagous/generalist reptiles, which suppressed many of the meso-predatory savanna species, including reptilian, amphibian and mammal species. In this pre-invasion ecosystem, prey groups including small mammals, small skinks and invertebrates persisted at moderate abundance. **b)** Shows how these interactions are predicted to alter following cane toad invasion. With the loss of ca. 80% of the large, anurophagous/generalist apex reptilian predators, meso-predatory snakes, frogs, skinks and agamids increased by ca. 250 % and cane toads were introduced as an additional meso-predator. Under this scenario, there was increased predation pressure on prey groups including small mammals, small skinks and some invertebrates (herbivorous) which resulted in declines in these groups of ca. 30-80%. Note that large predatory invertebrates including carabid beetles and centipedes neither declined nor increased following cane toad invasion.
